# Supplementary material for: Applying the Dark Target aerosol algorithm with Advanced Himawari Imager observations during the KORUS-AQ field campaign
Source: Copernicus journal article supplement (doi:10.5194/amt-12-6557-2019), 2019-12-11

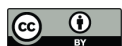

*Supplement of*

## **Applying the Dark Target aerosol algorithm with Advanced Himawari Imager observations during the KORUS-AQ field campaign**

**Pawan Gupta et al.**

*Correspondence to:* Pawan Gupta ([pawan.gupta@nasa.gov](mailto:pawan.gupta@nasa.gov))

The copyright of individual parts of the supplement might differ from the CC BY 4.0 License.

# Anmyon

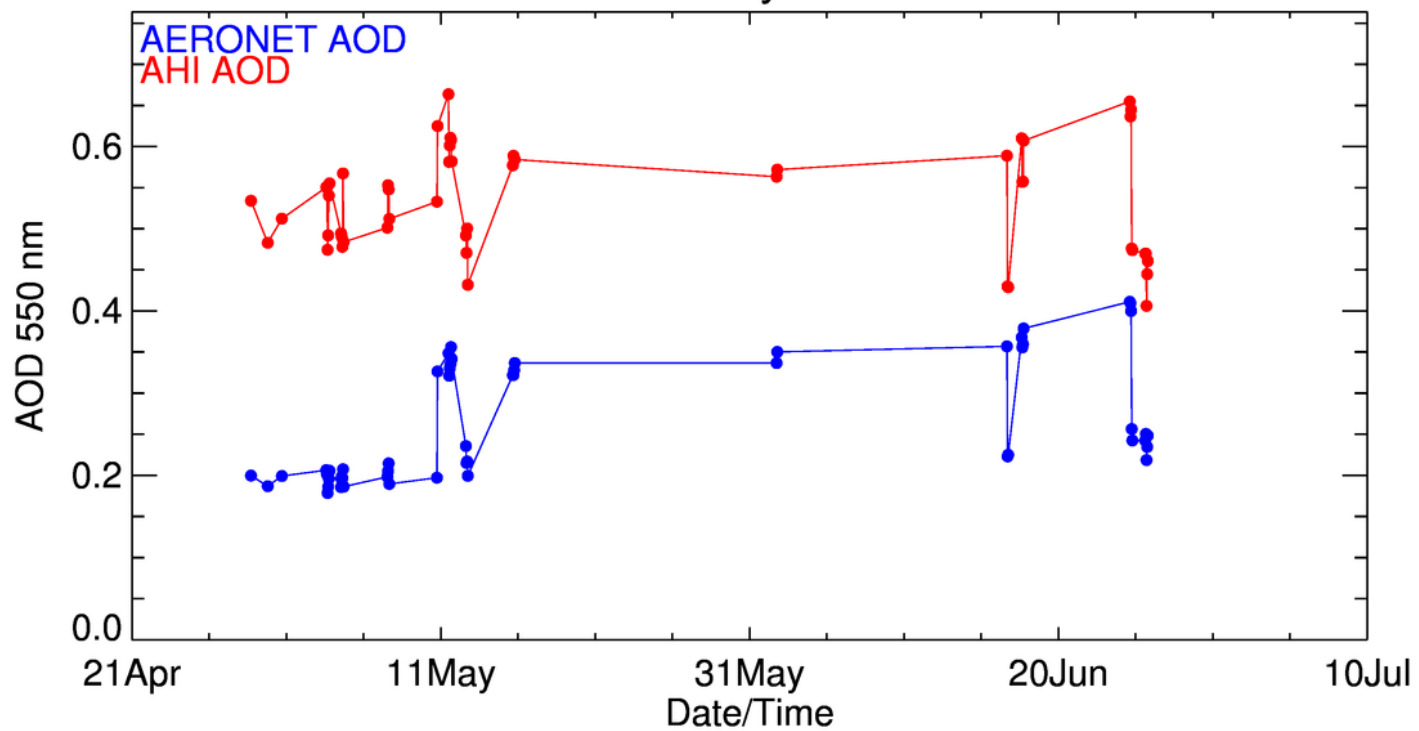

# Bac\_Lieu

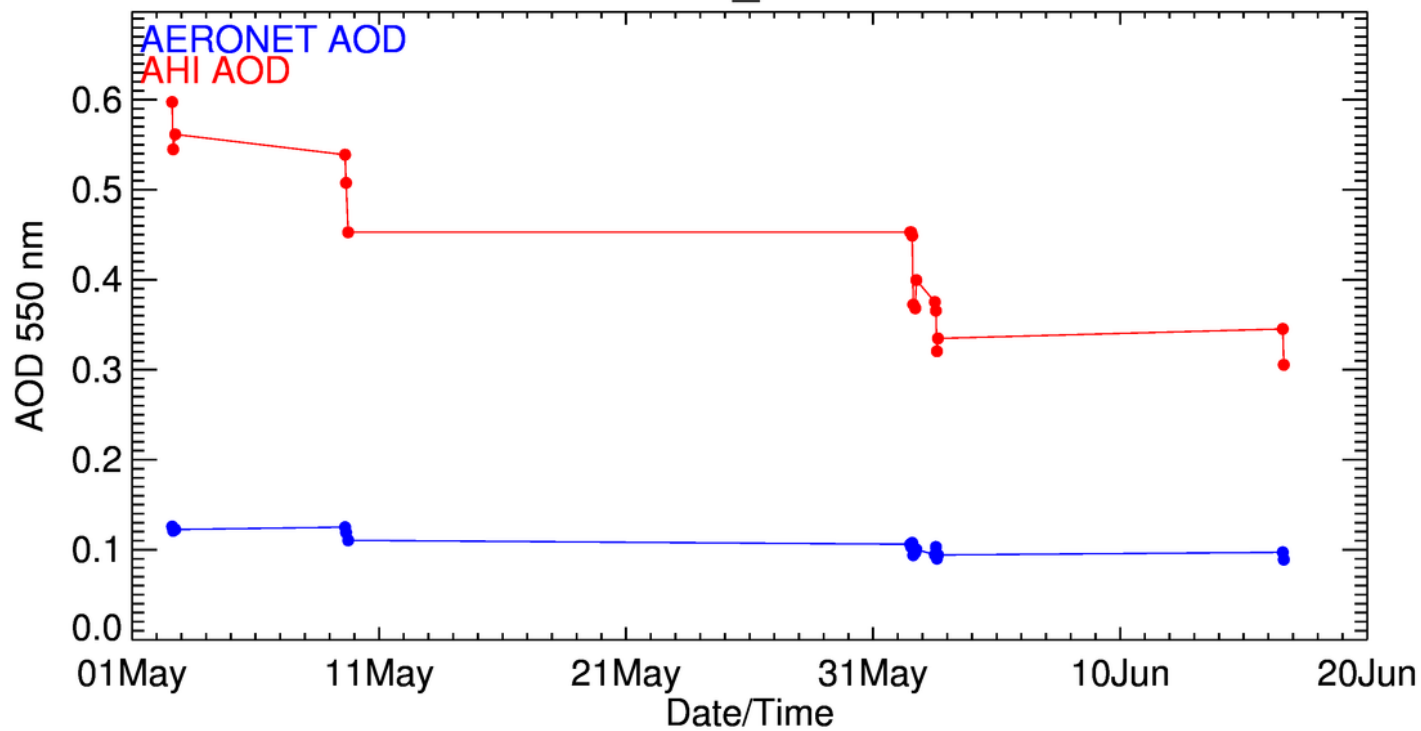

# Baengnyeong

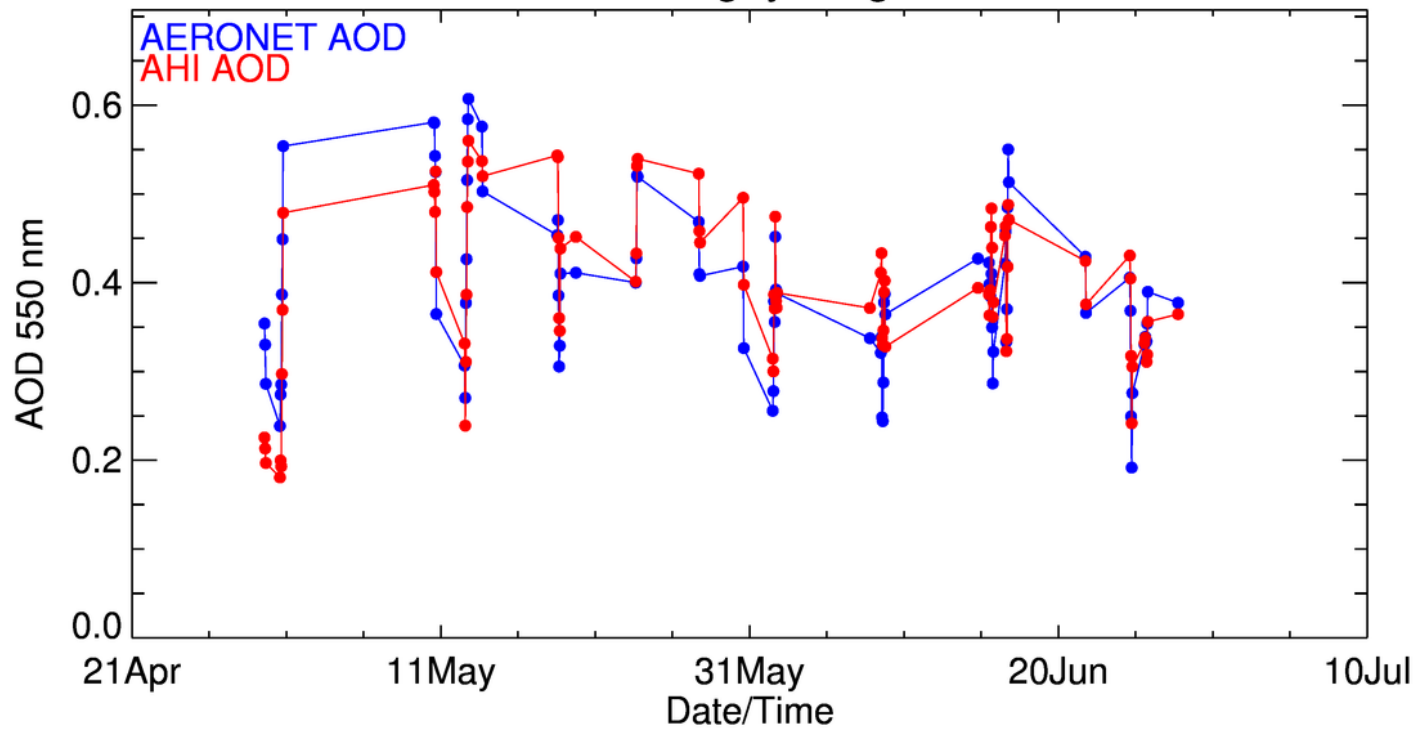

# Bandung

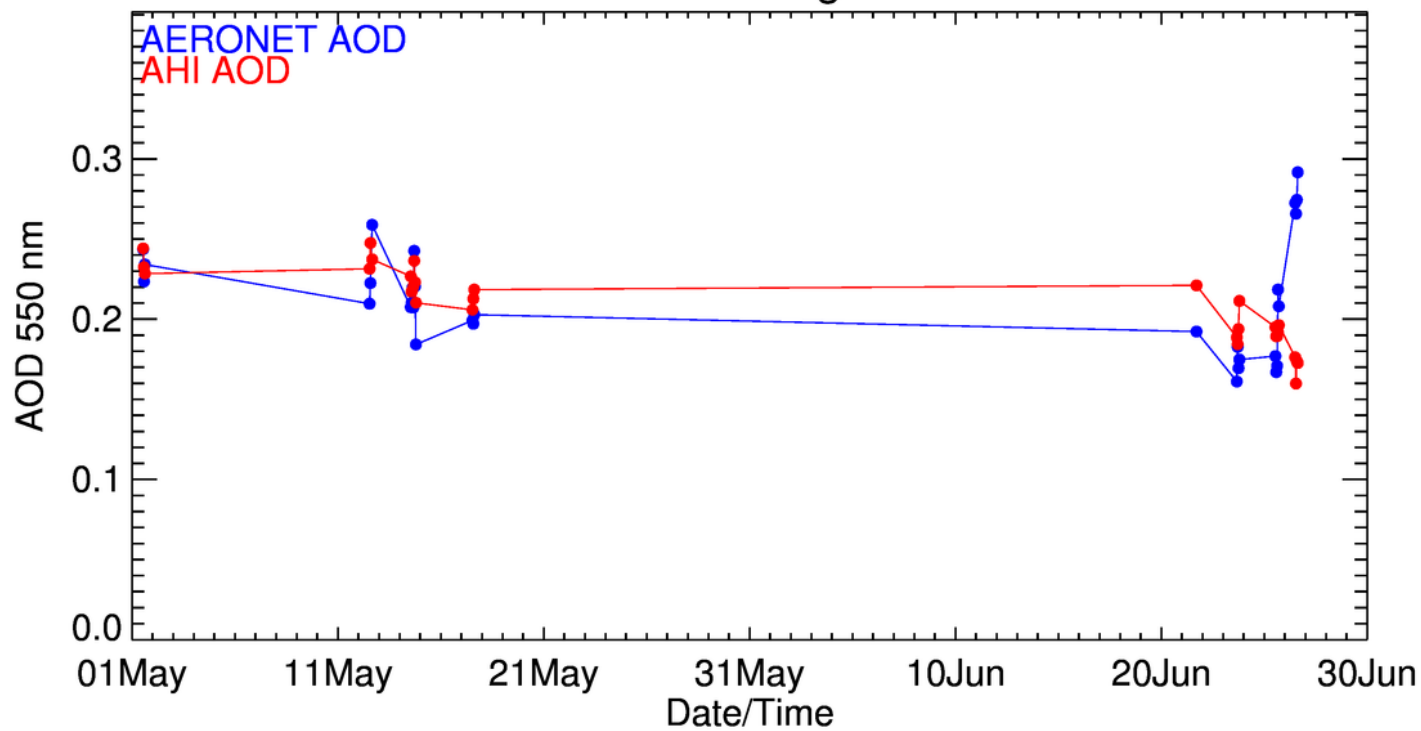

# Beijing

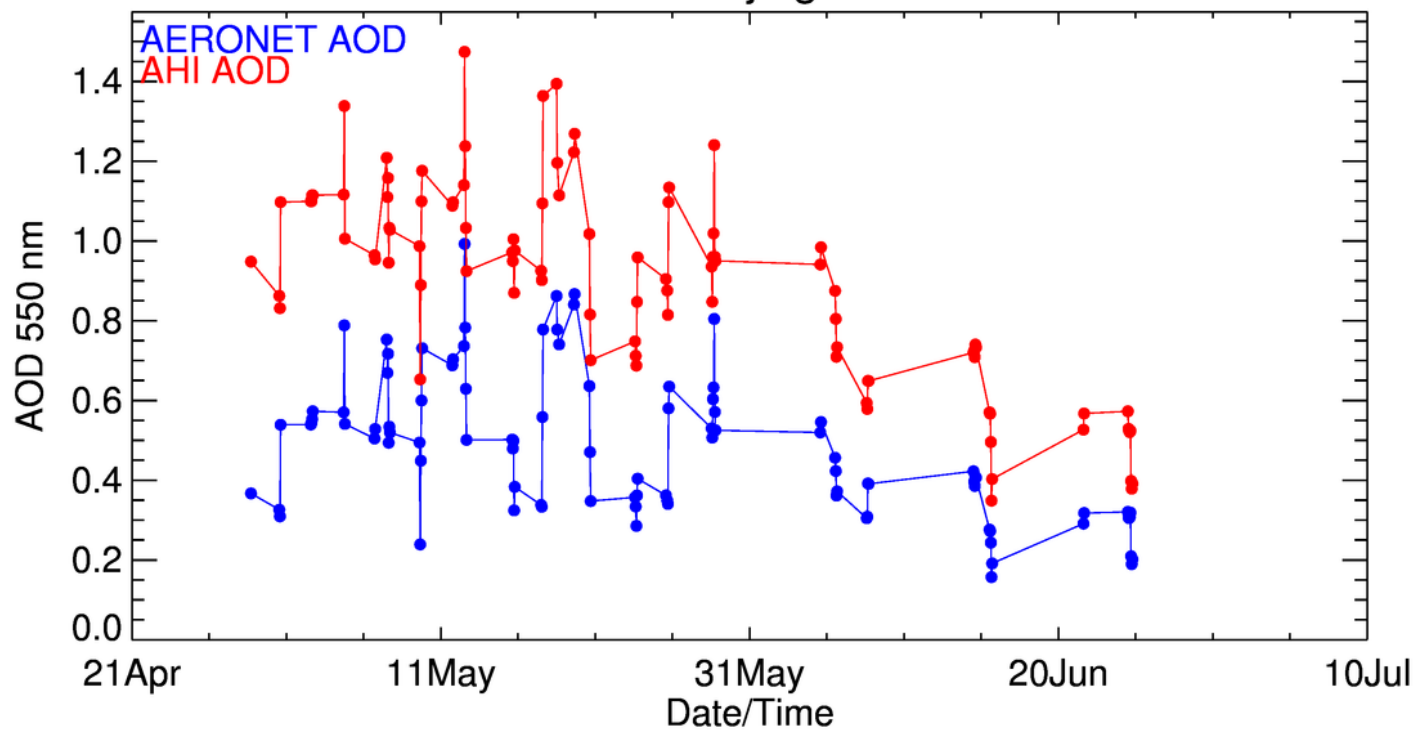

# BMKG\_GAW\_PALU

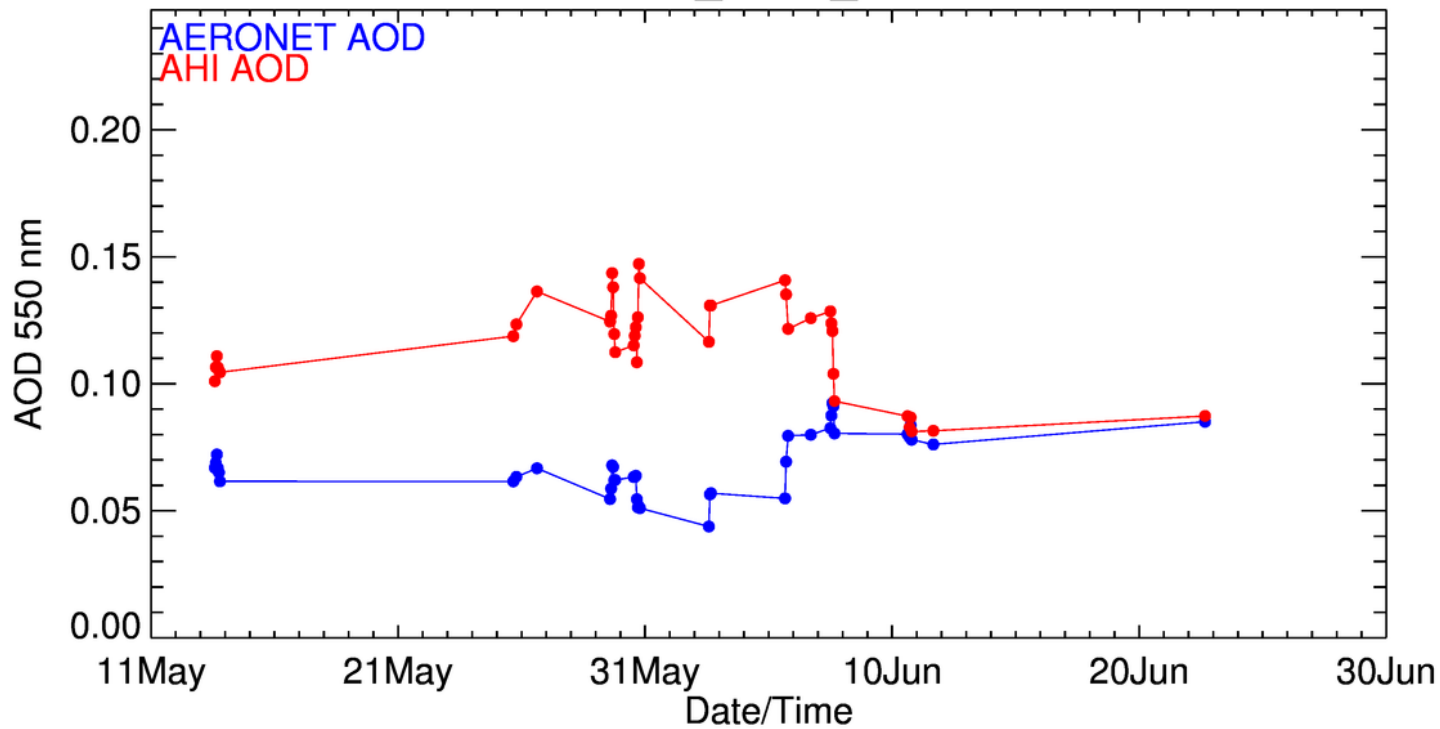

# Chen-Kung\_Univ

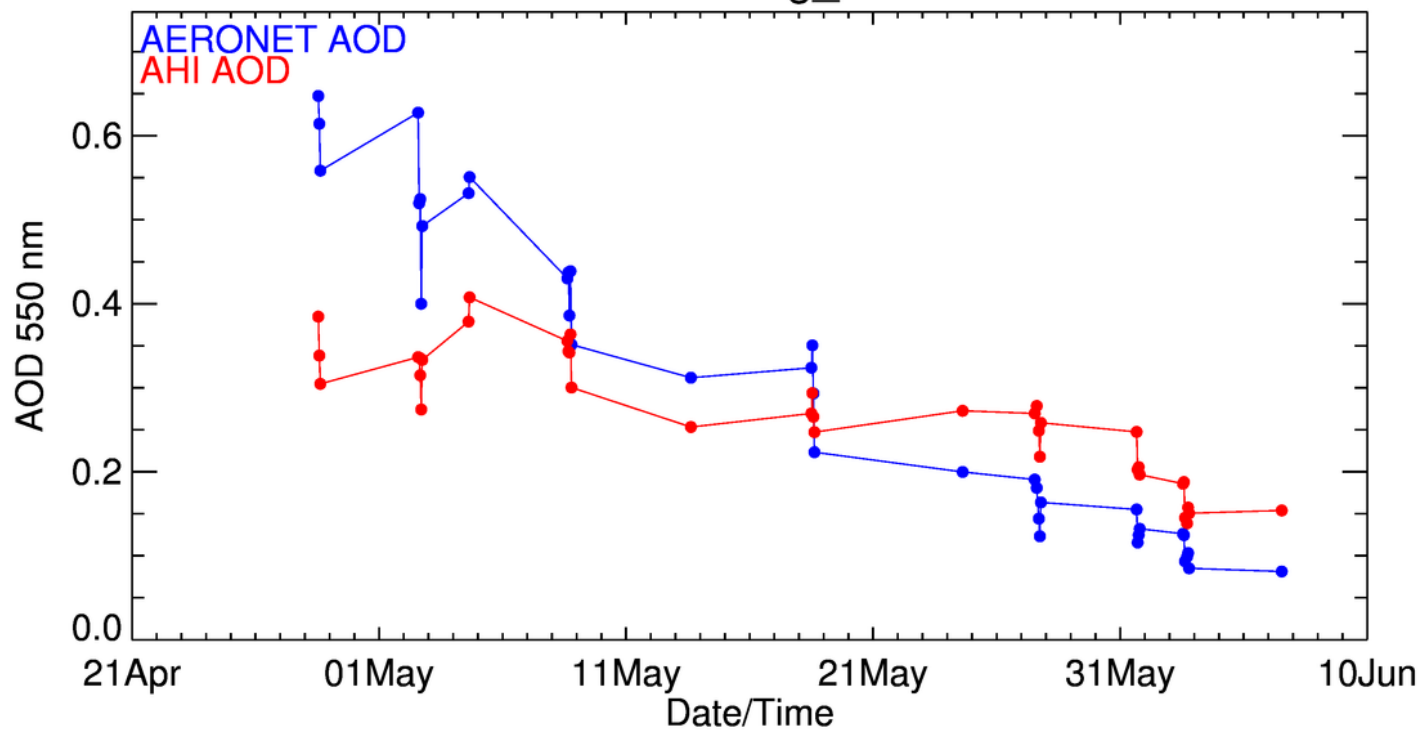



# Chiang\_Mai\_Met\_Sta

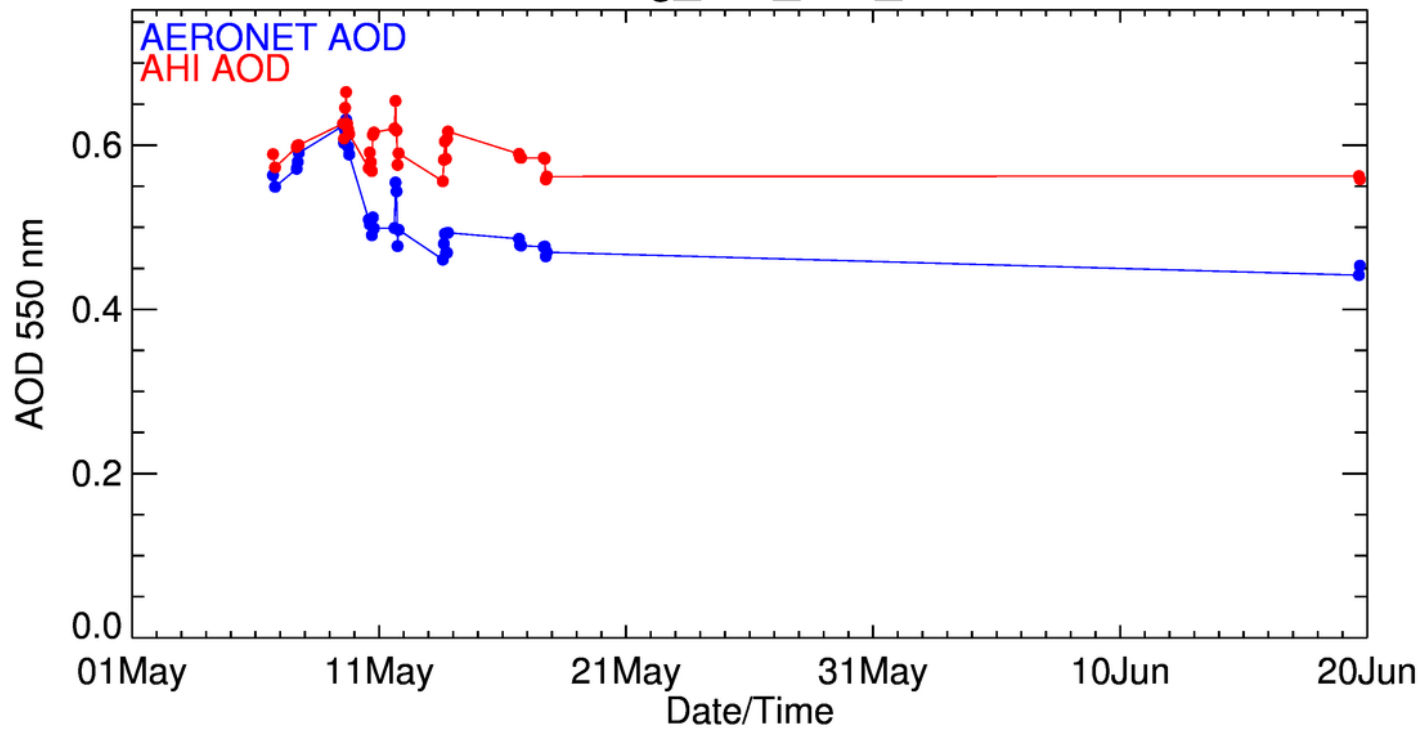

# Chiayi

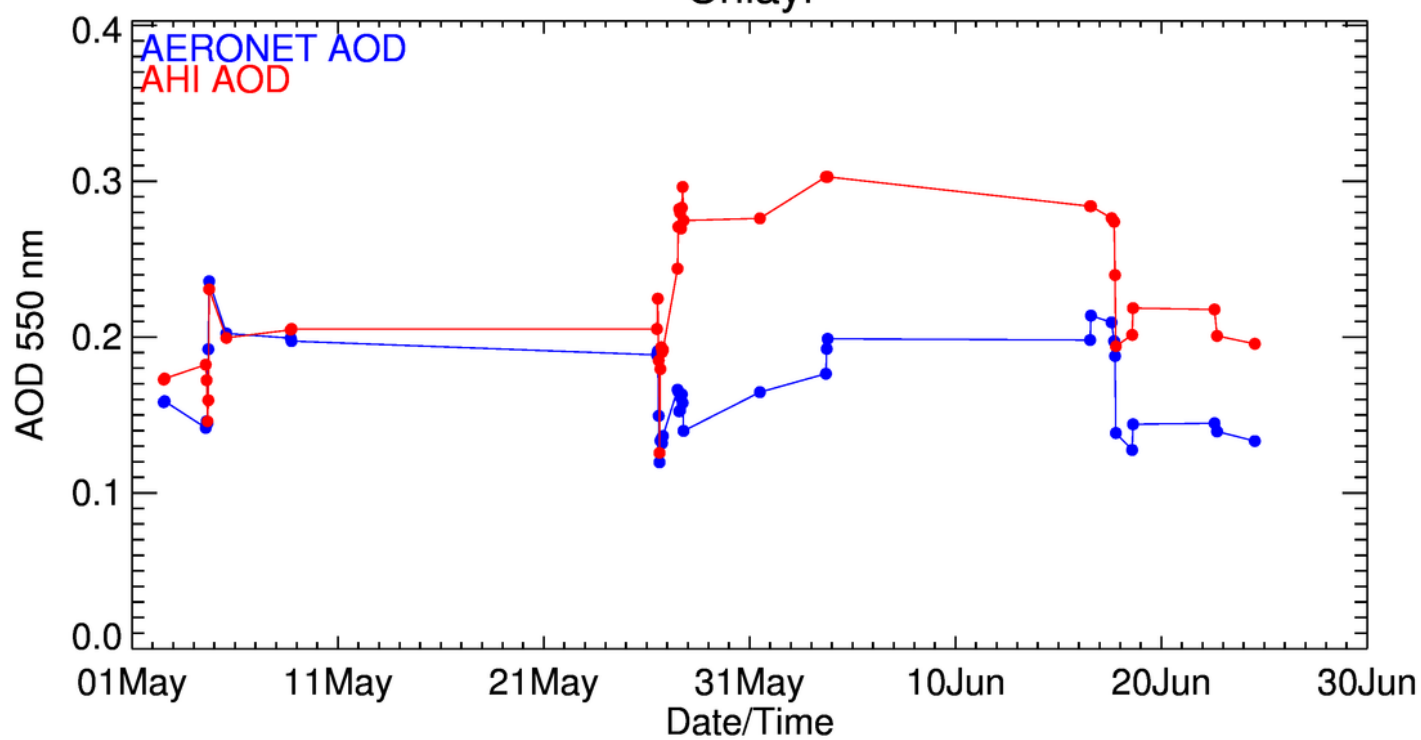

# Chiba\_University

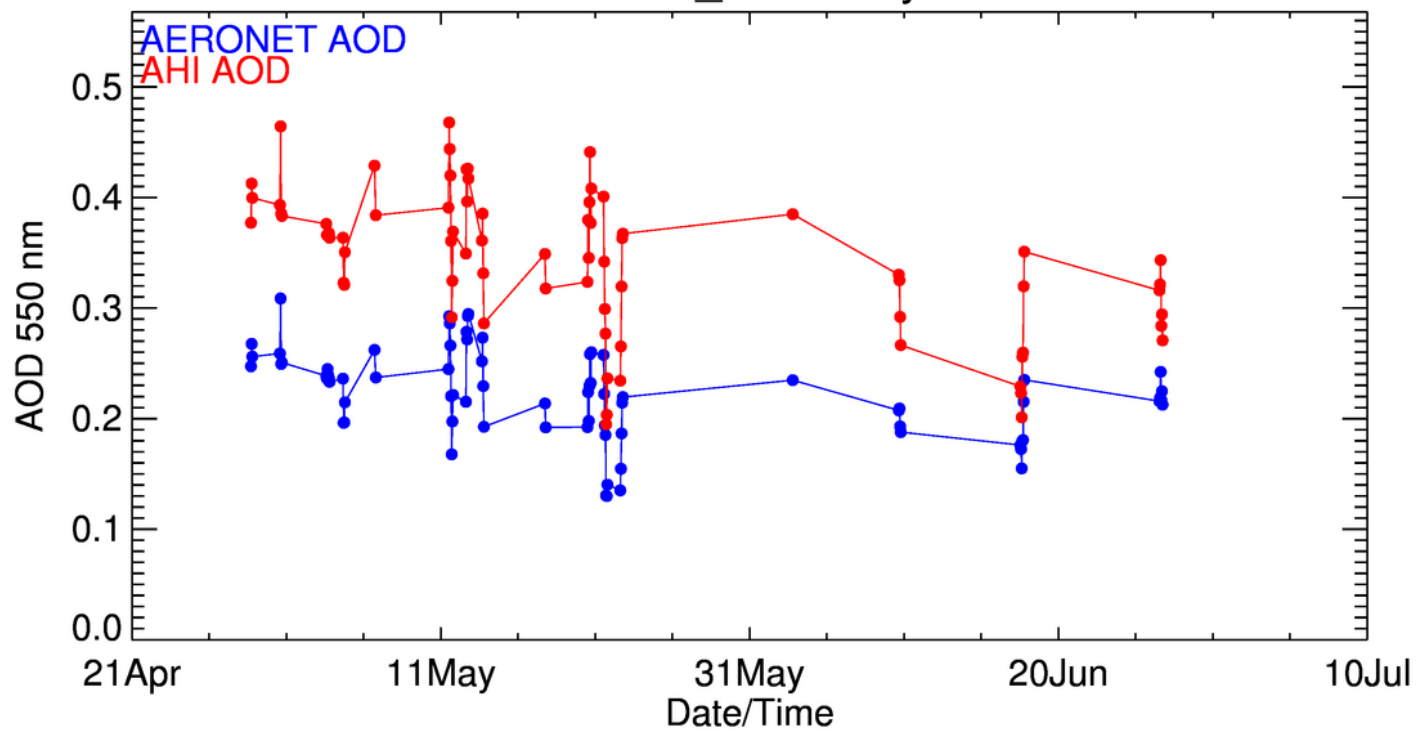

# Dalanzadgad

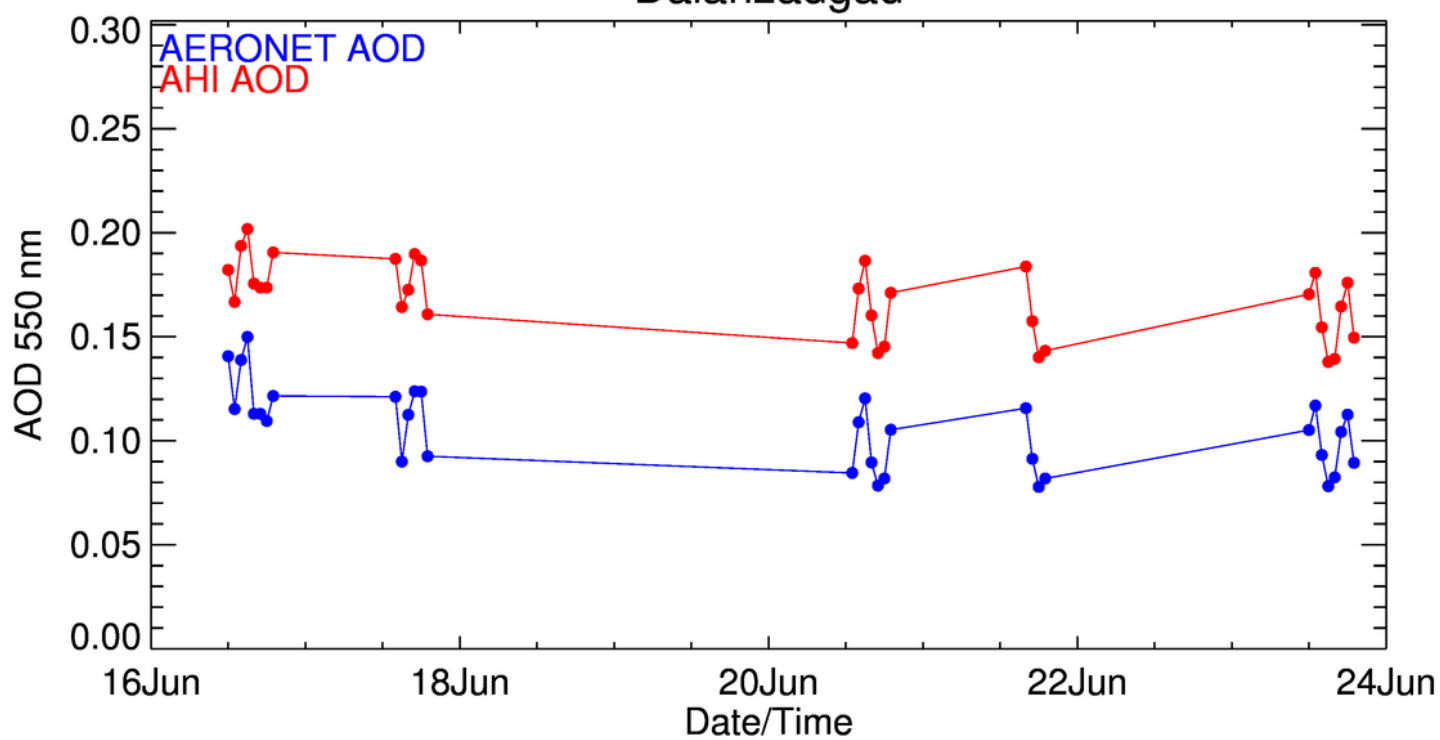

# EPA-NCU

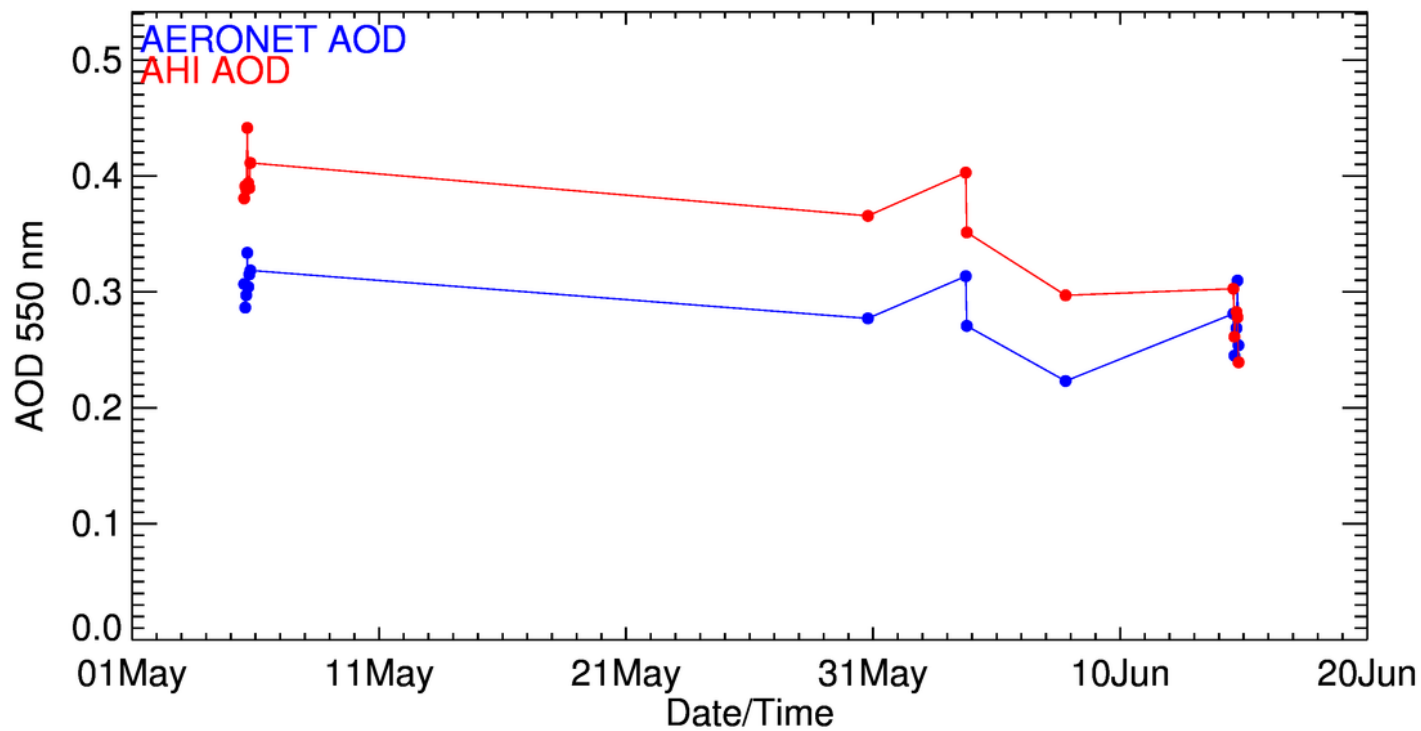

# Fukuoka

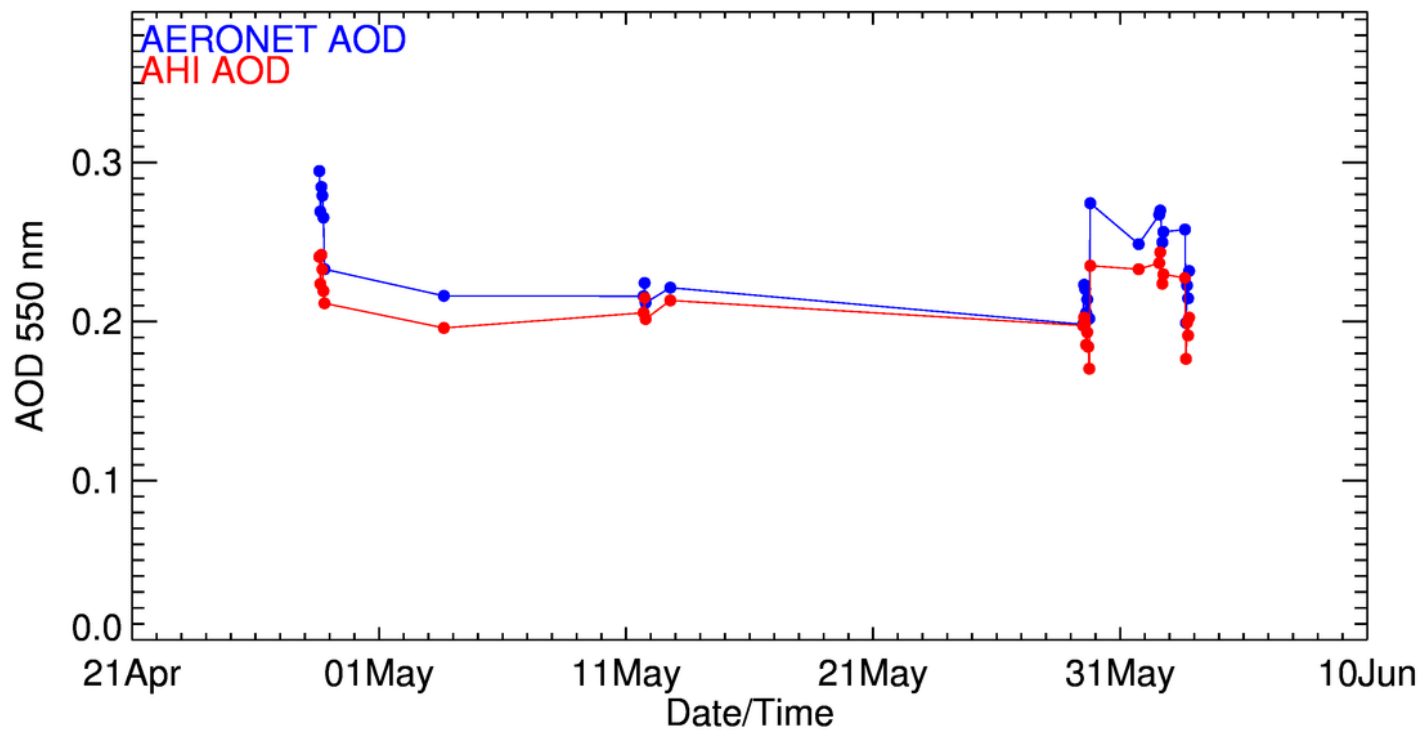

# Gandhi\_College

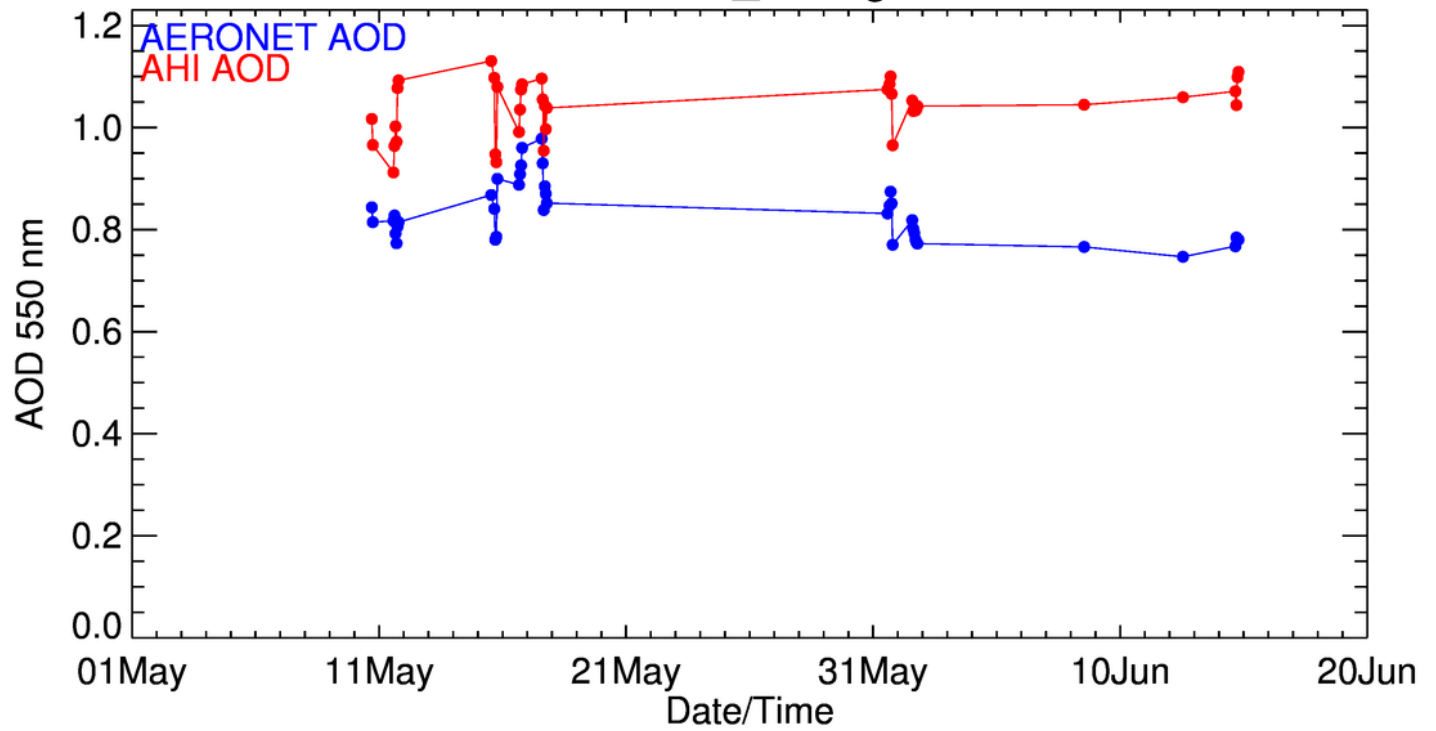

# Gangneung\_WNU

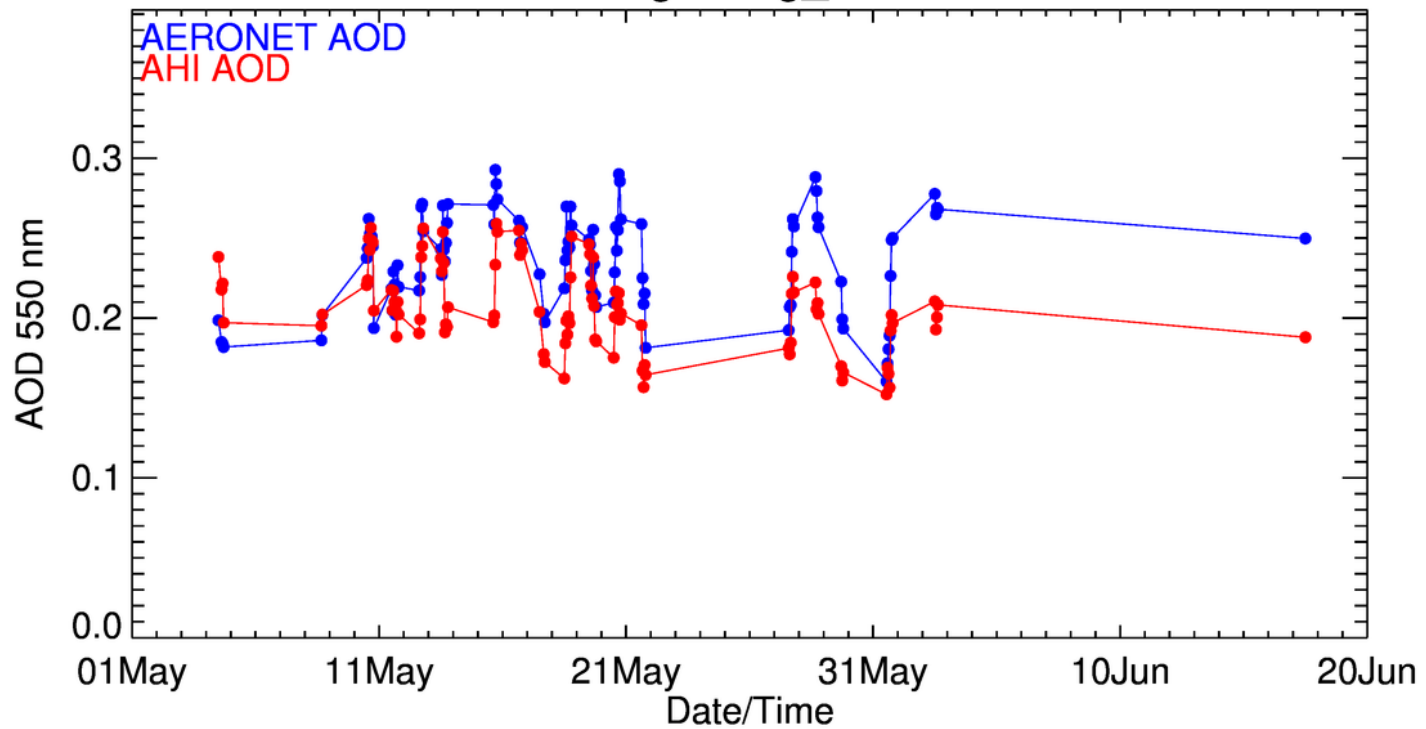



# Gosan\_SNU

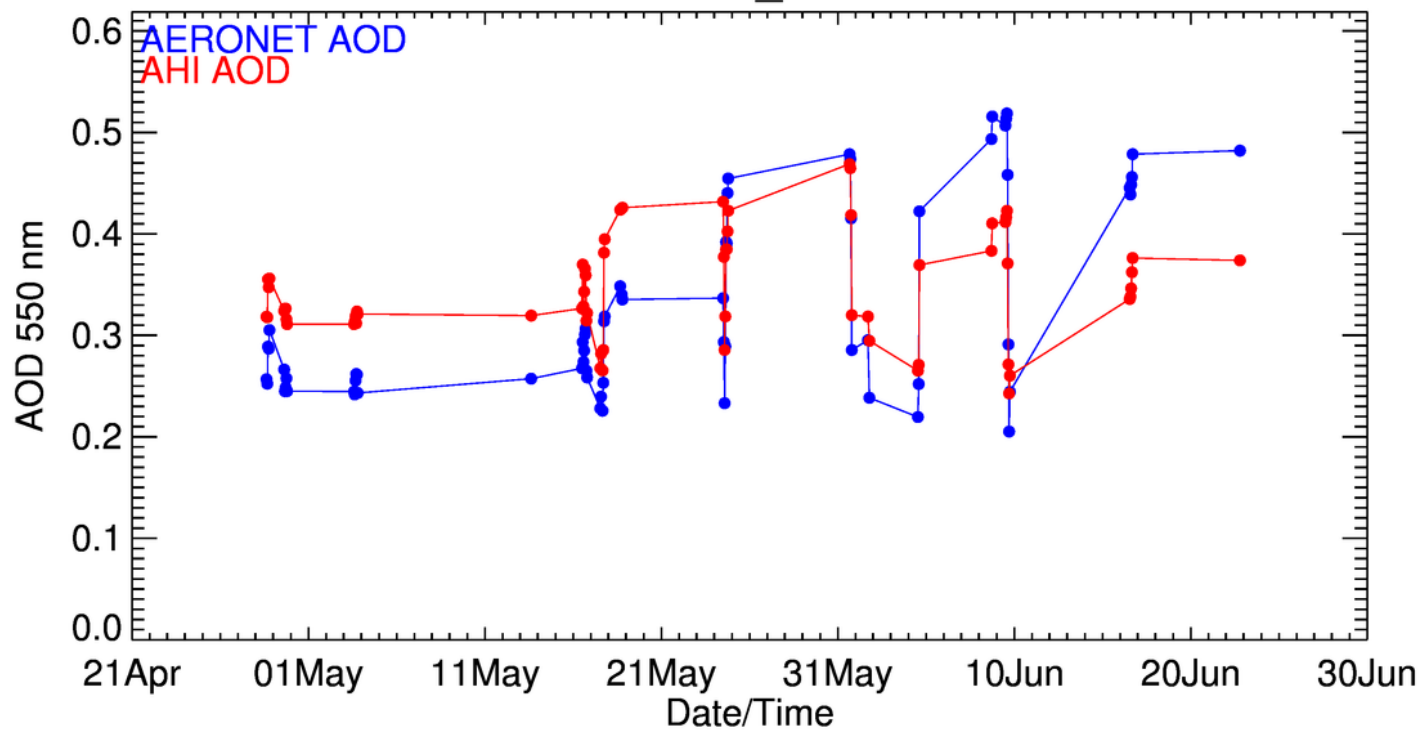

# Gwangju\_GIST

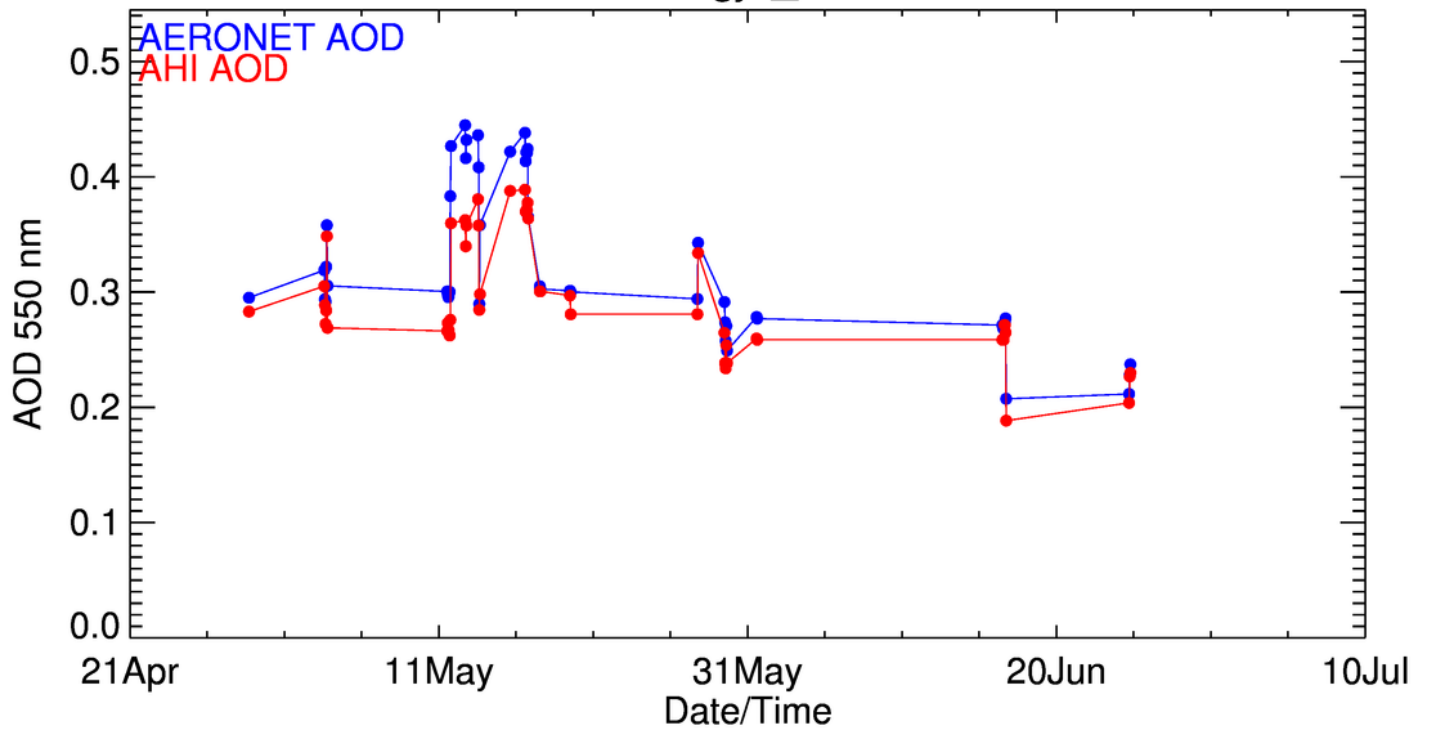

# Hankuk\_UFS

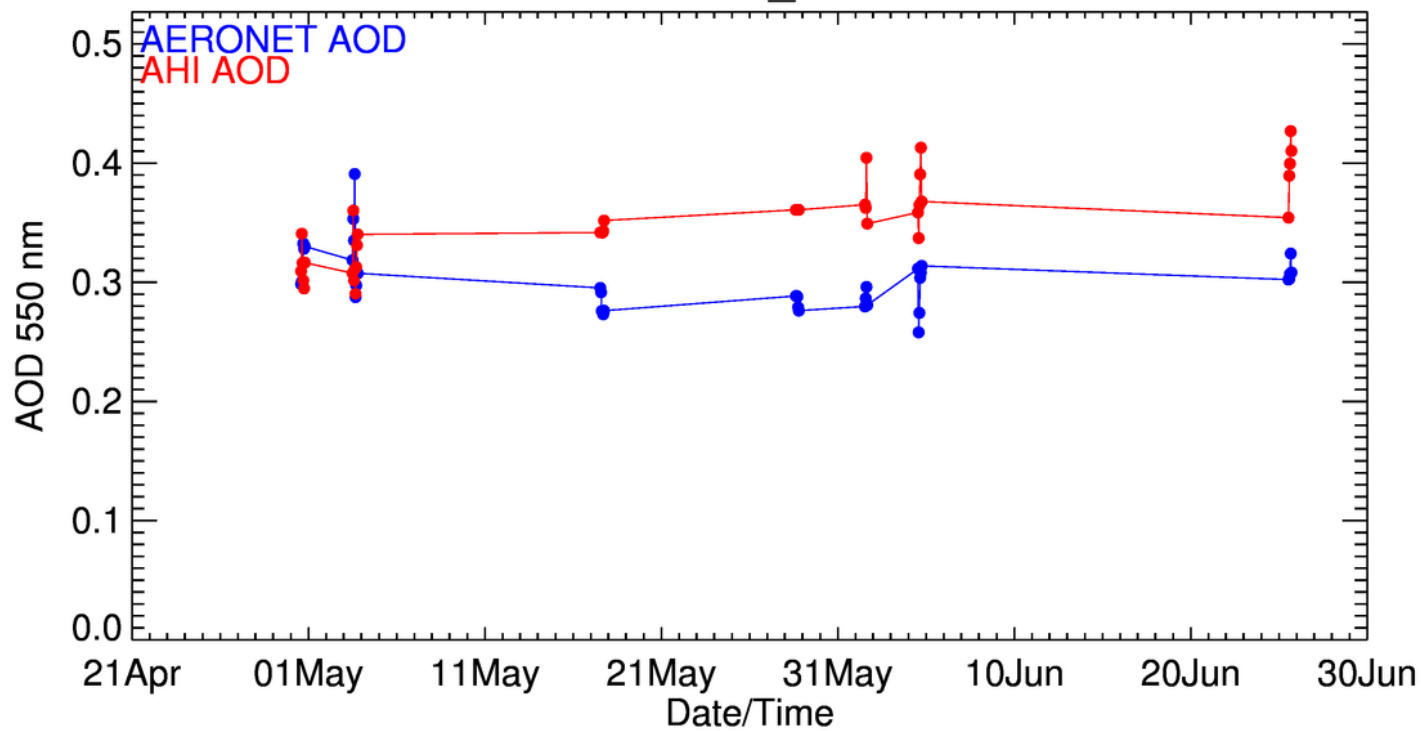

# Hokkaido\_University

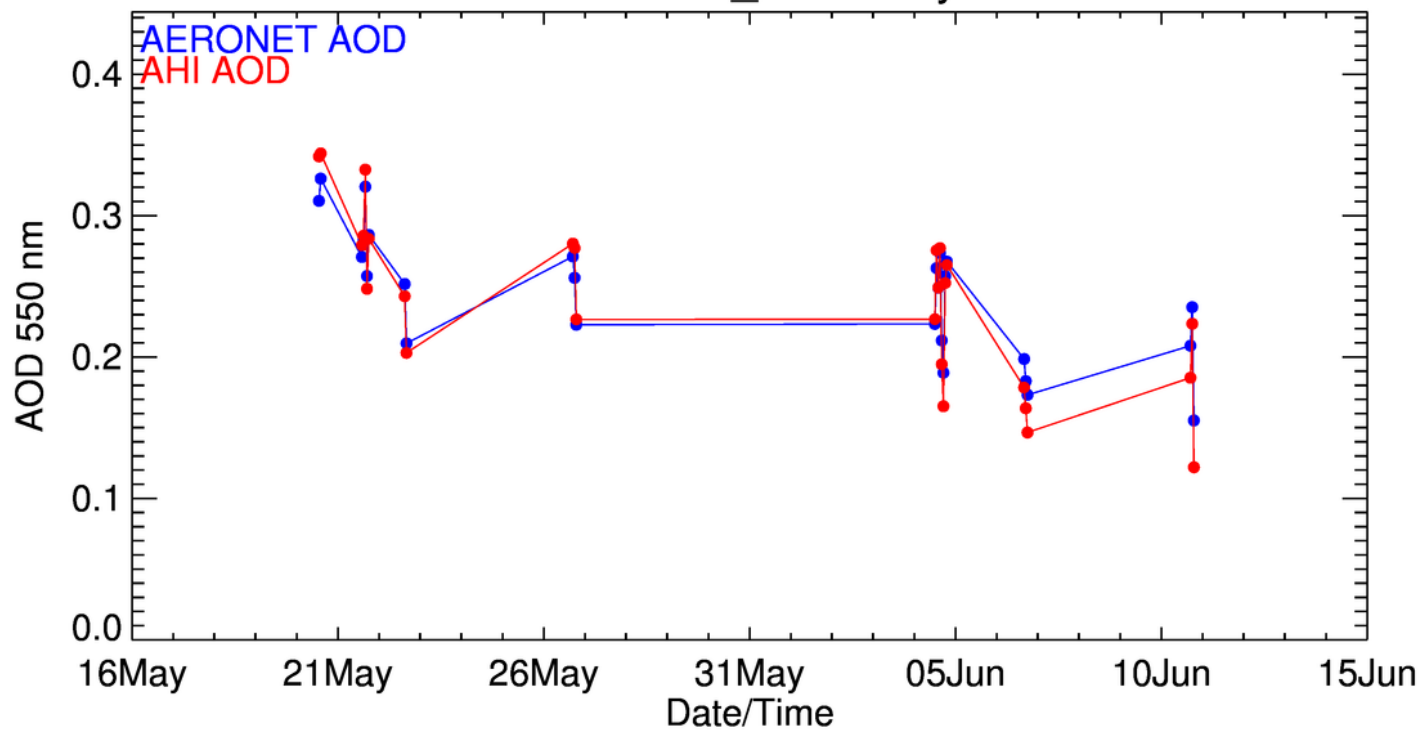

# Jabiru

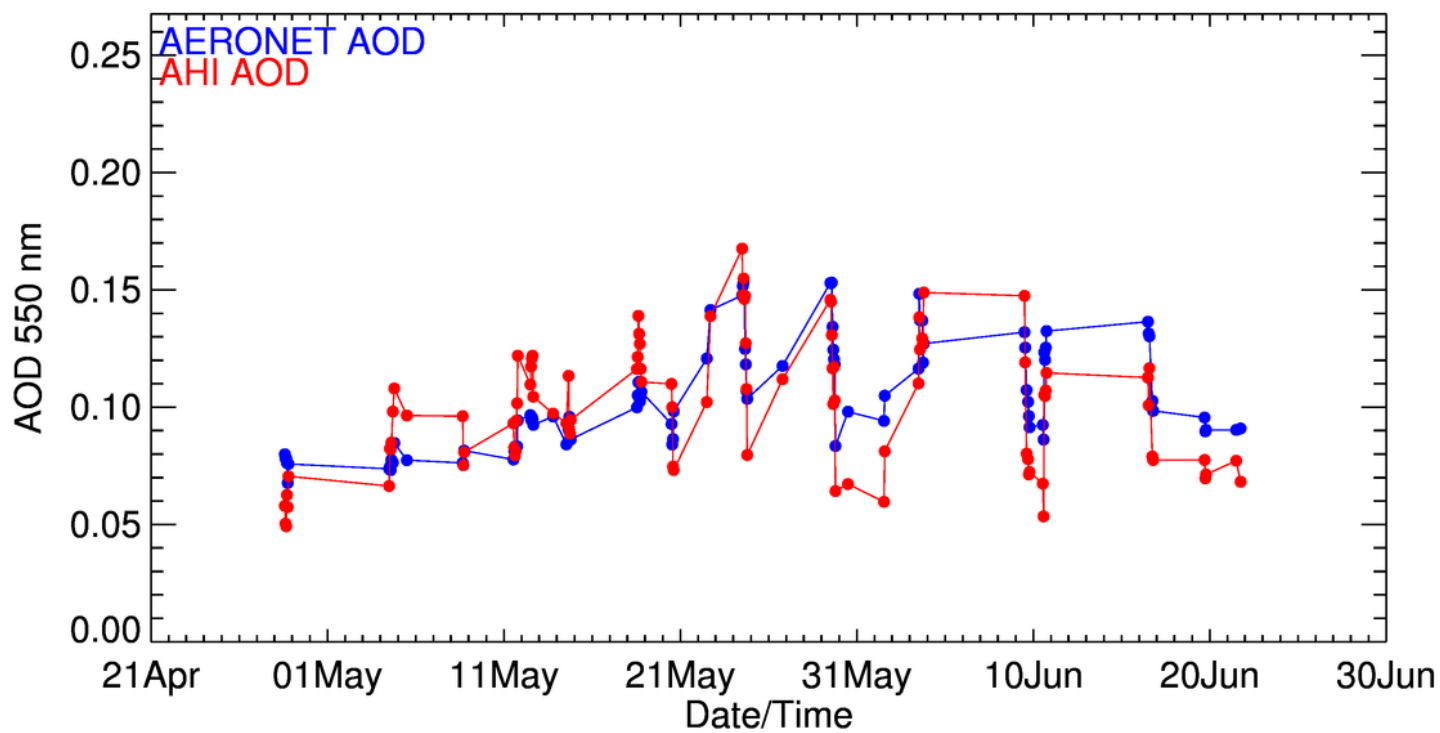

# Kanpur

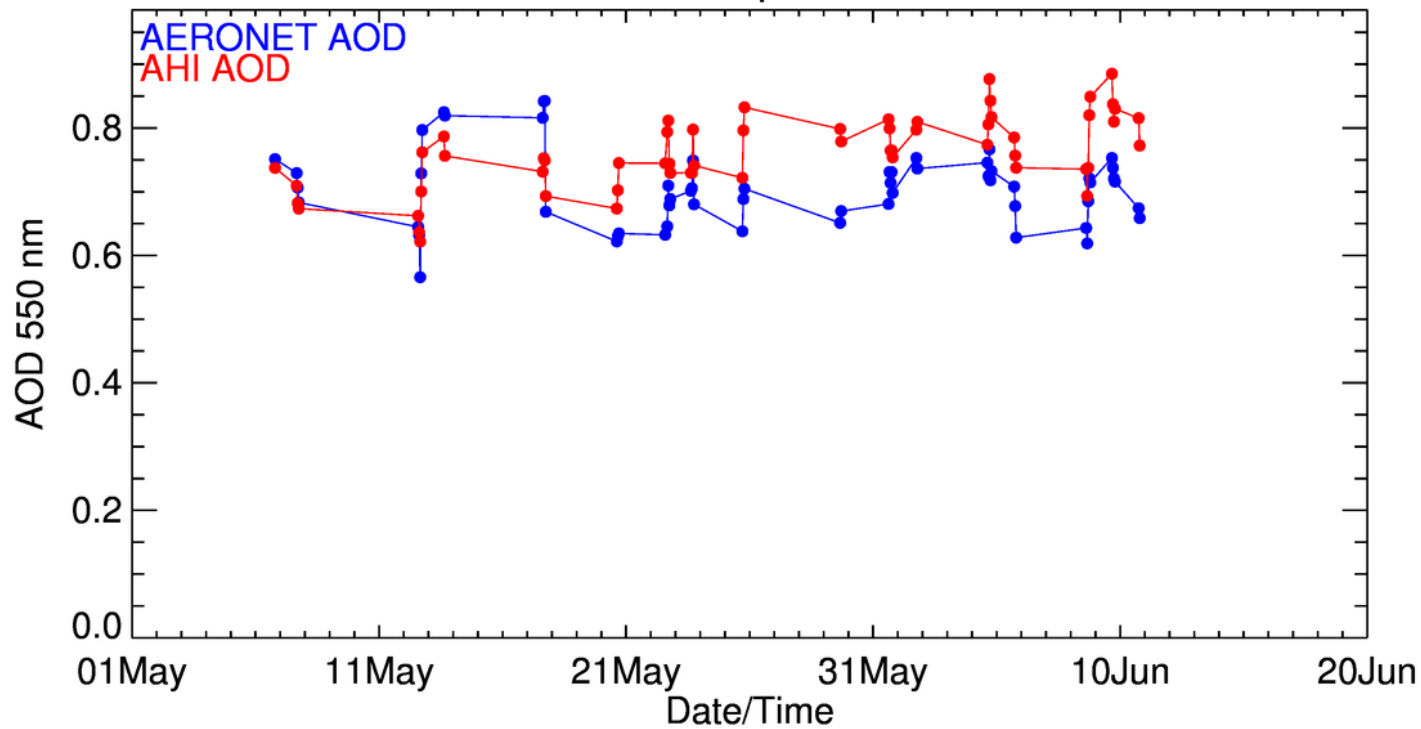

# KORUS\_Daegwallyeong

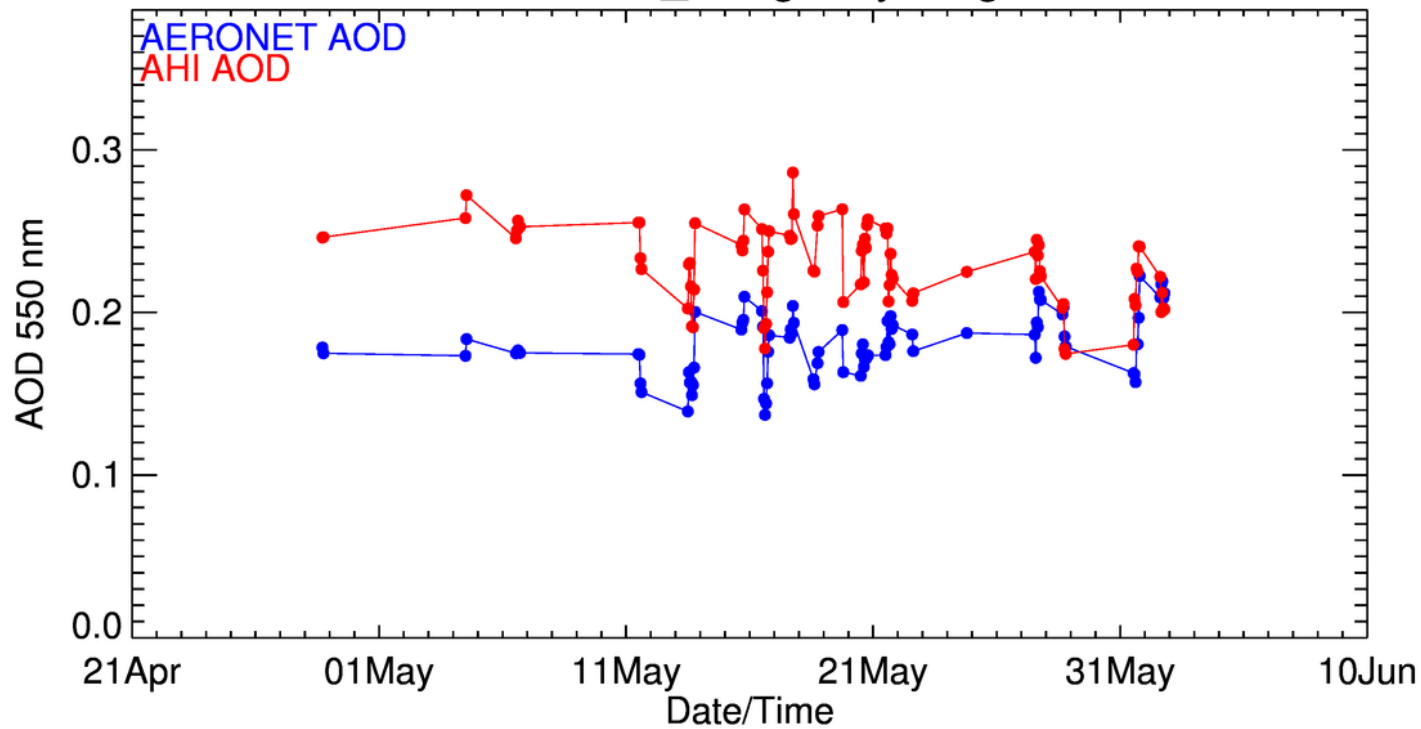

# KORUS\_Iksan

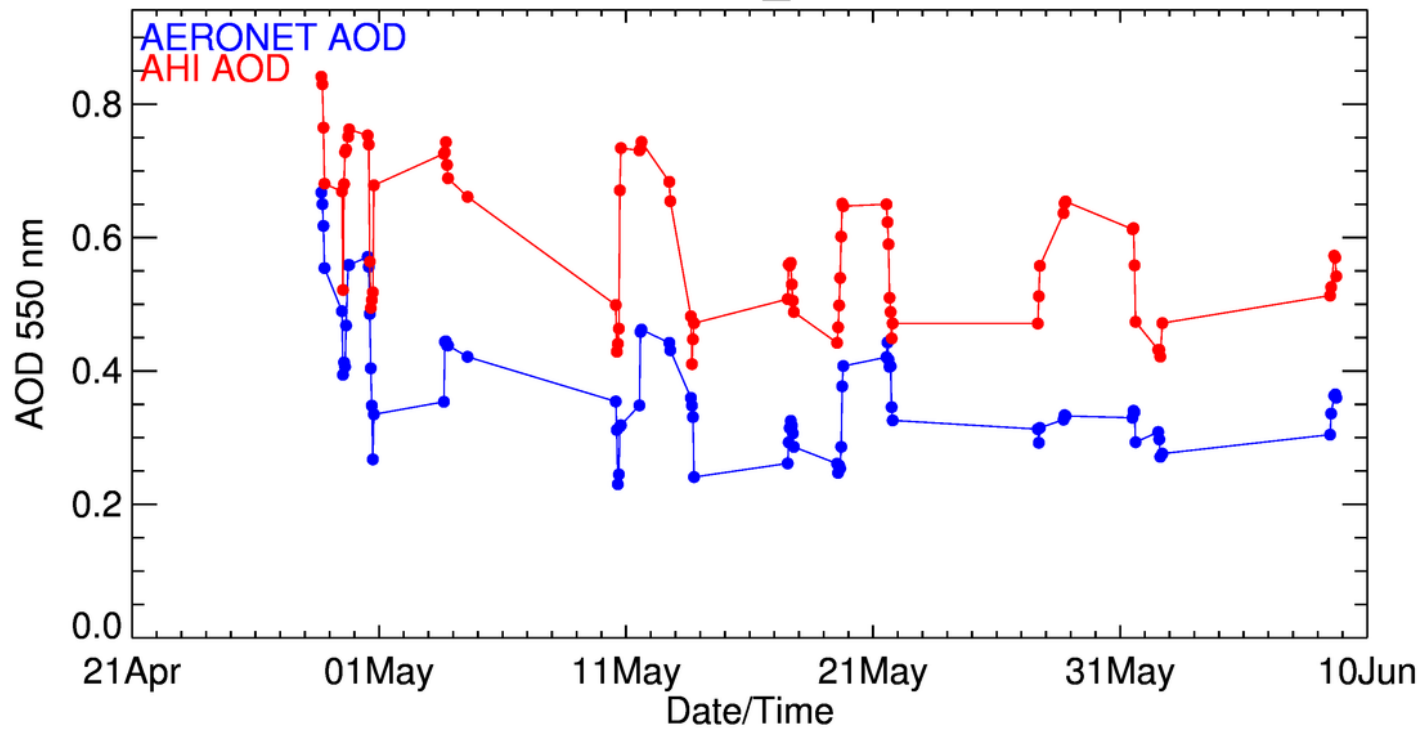



# KORUS\_Kyungpook\_NU

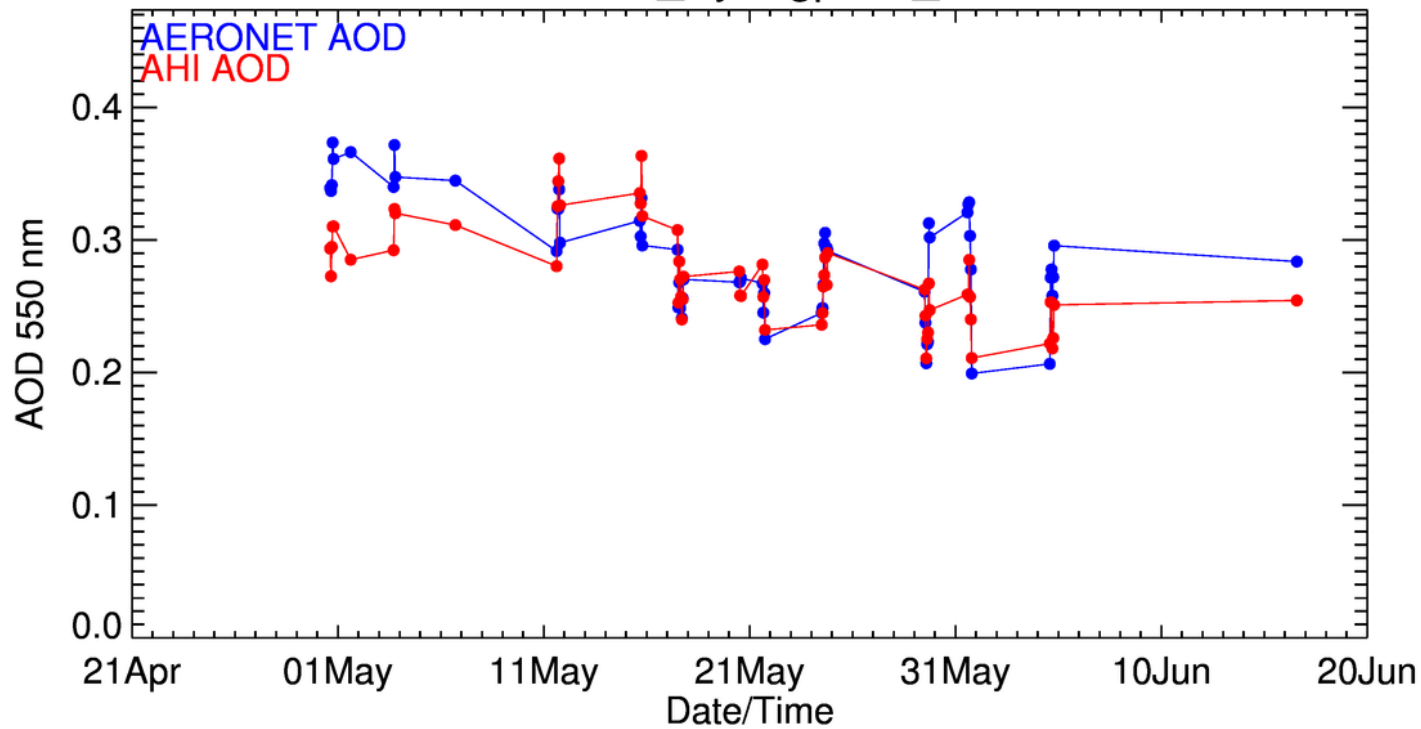

# KORUS\_Mokpo\_NU

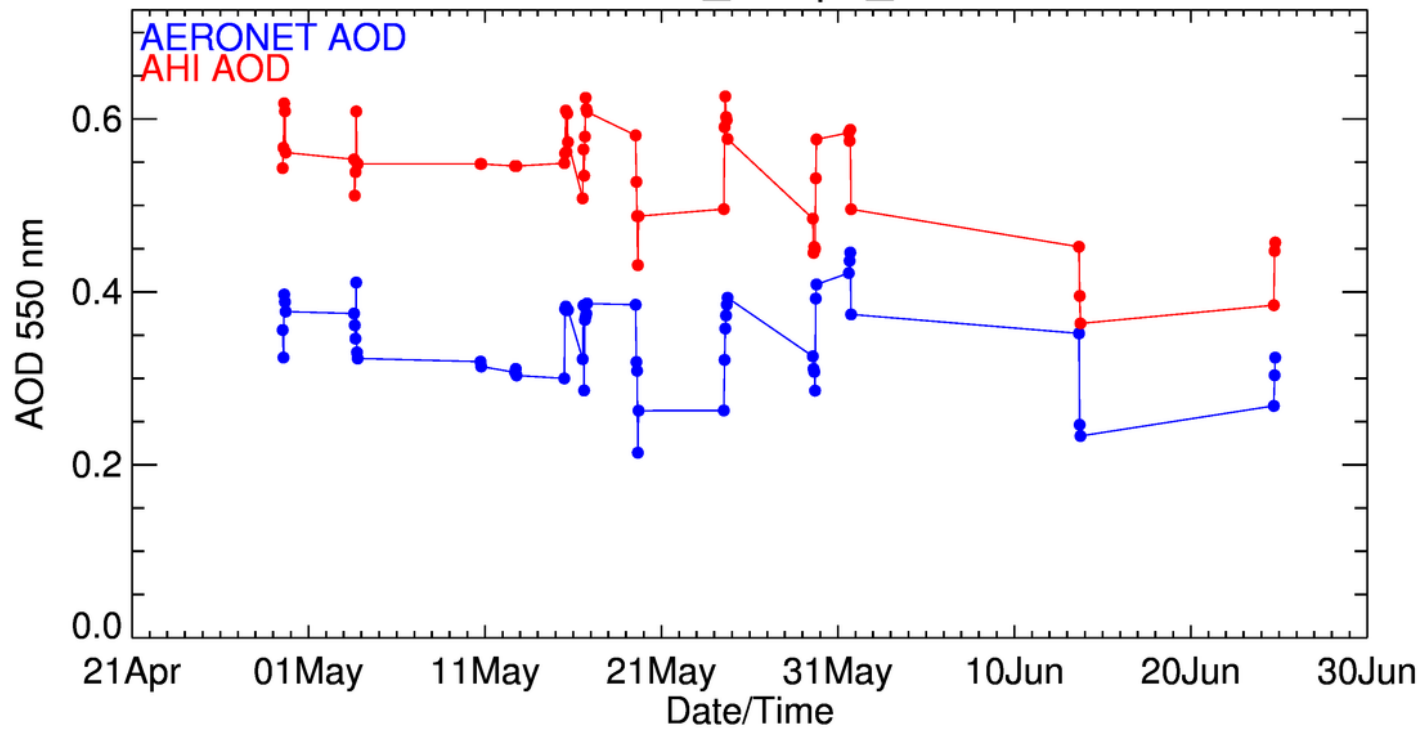

# KORUS\_NIER

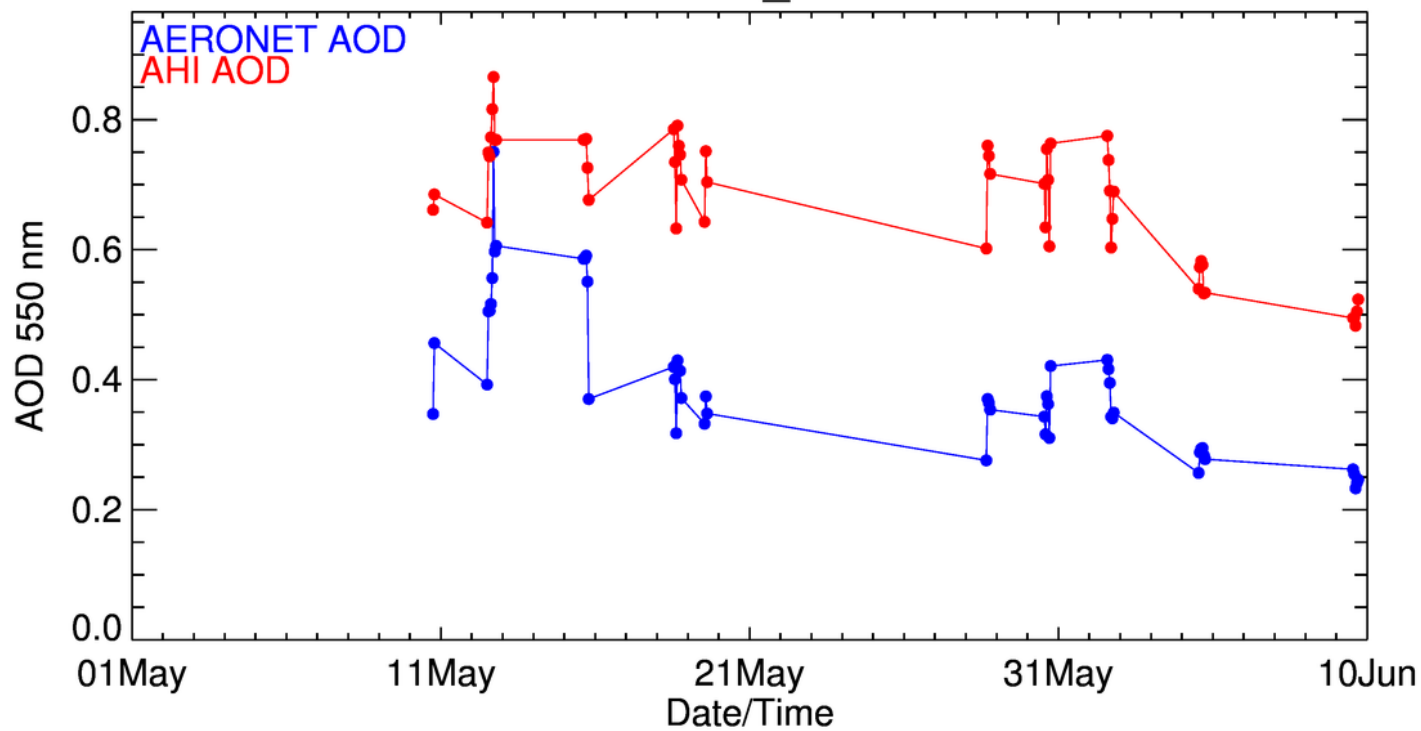

# KORUS\_Olympic\_Park

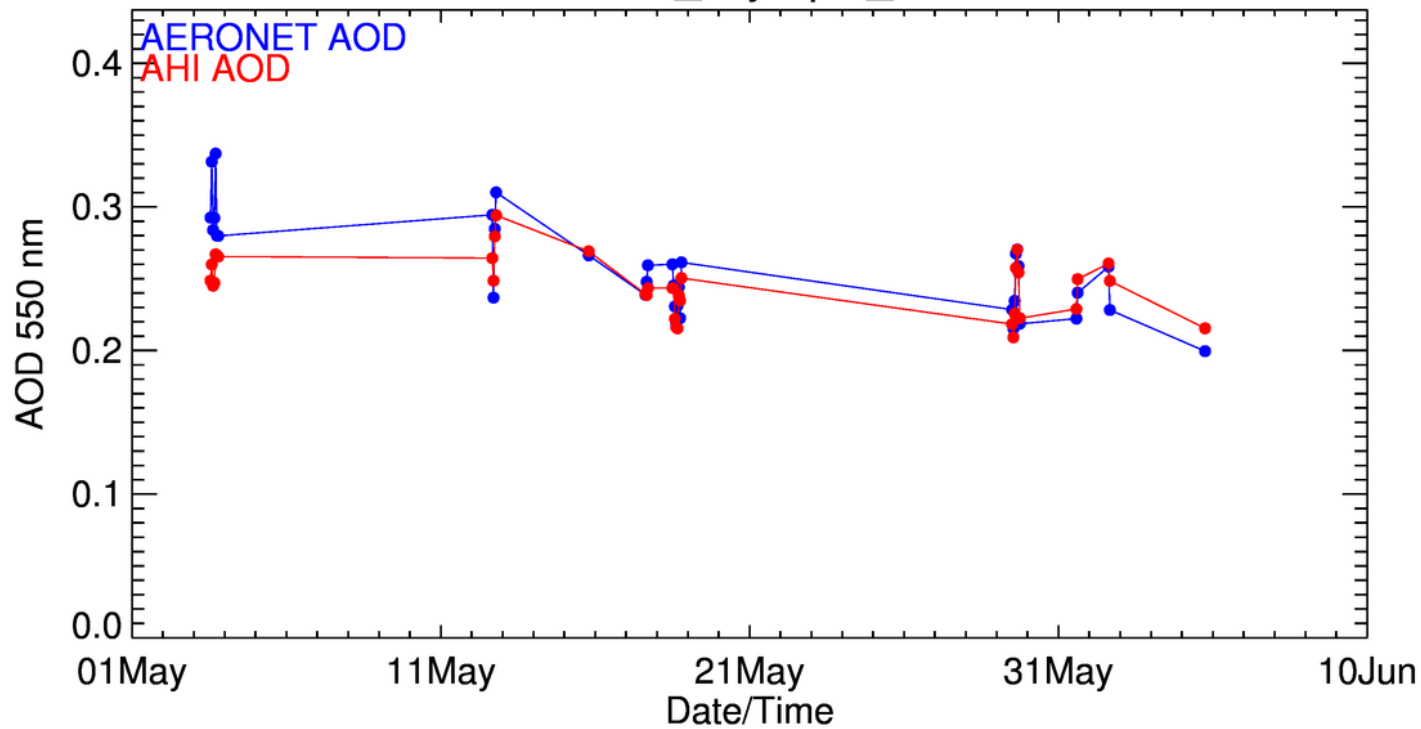

# KORUS\_Songchon

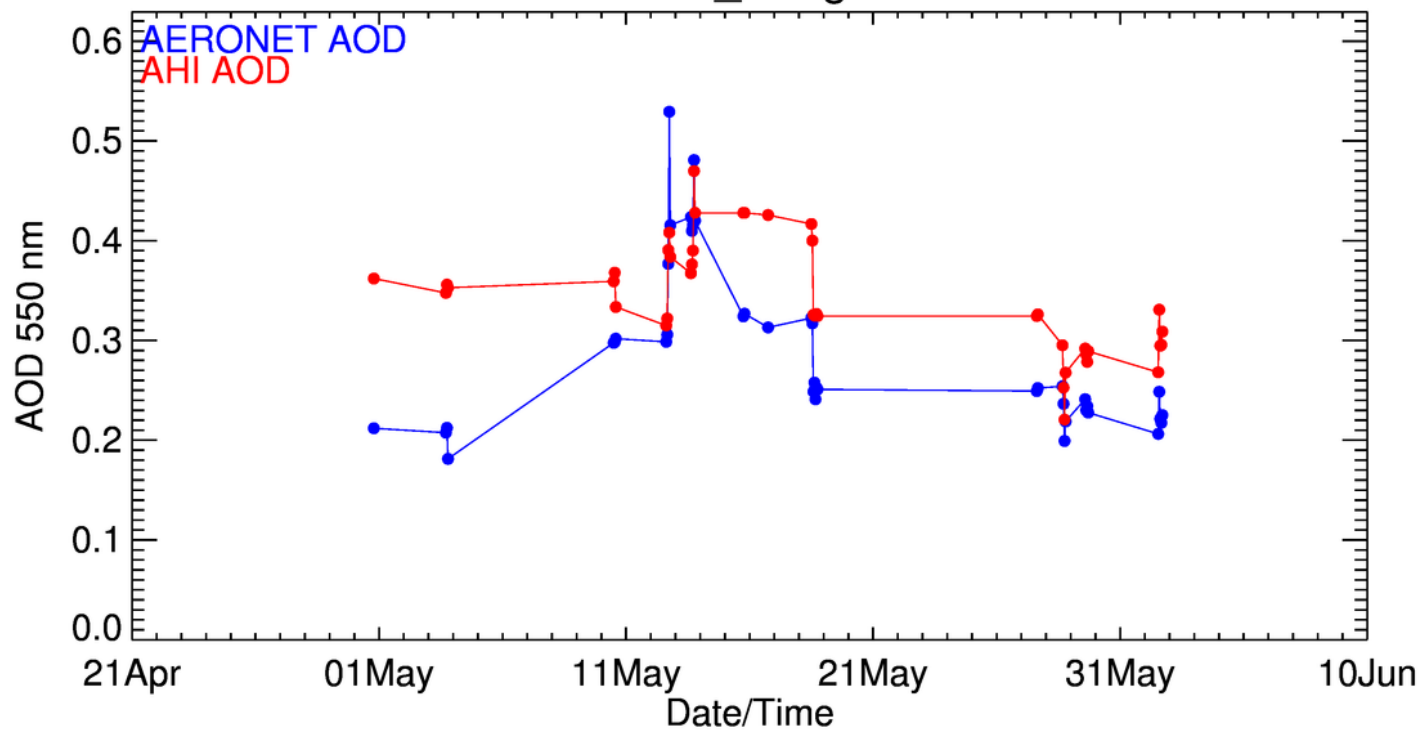

# KORUS\_Taehwa

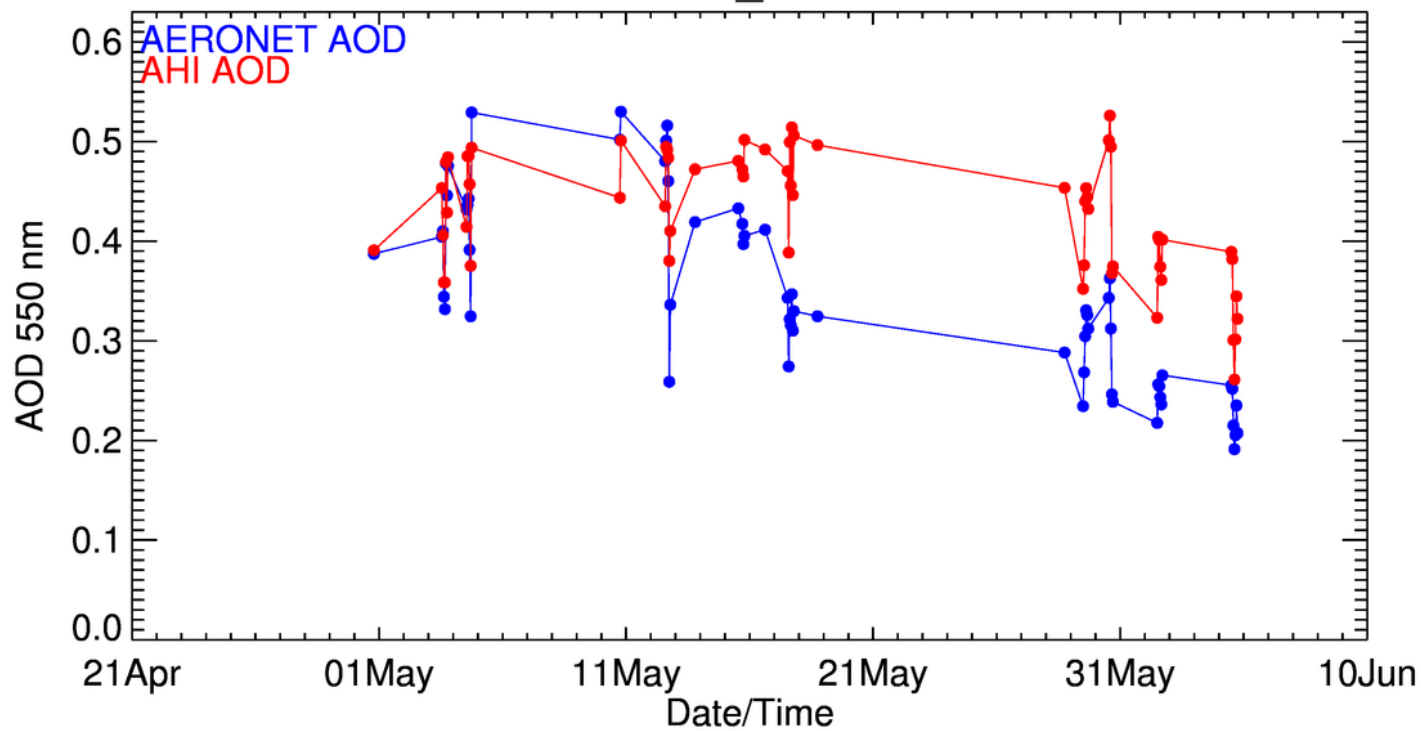

# Lake\_Argyle

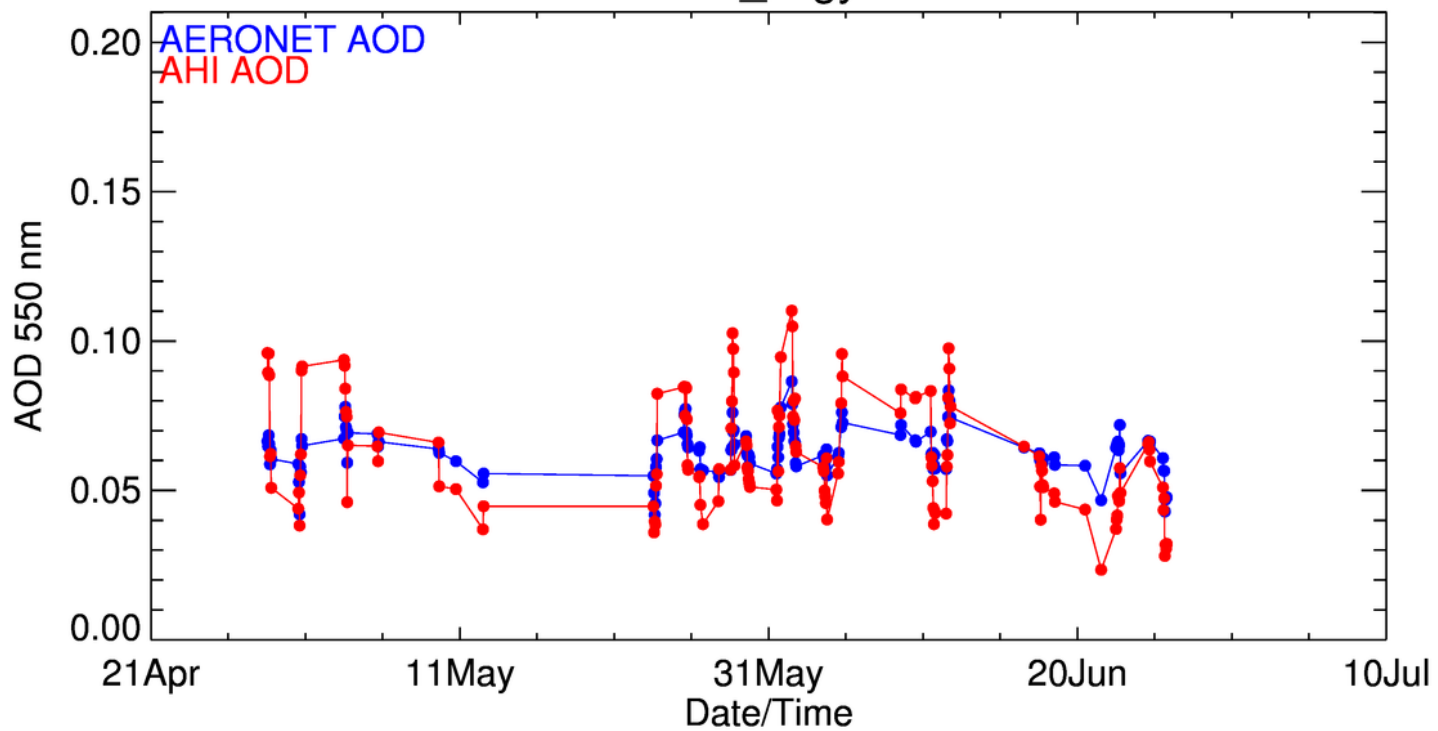

# Luang\_Namtha

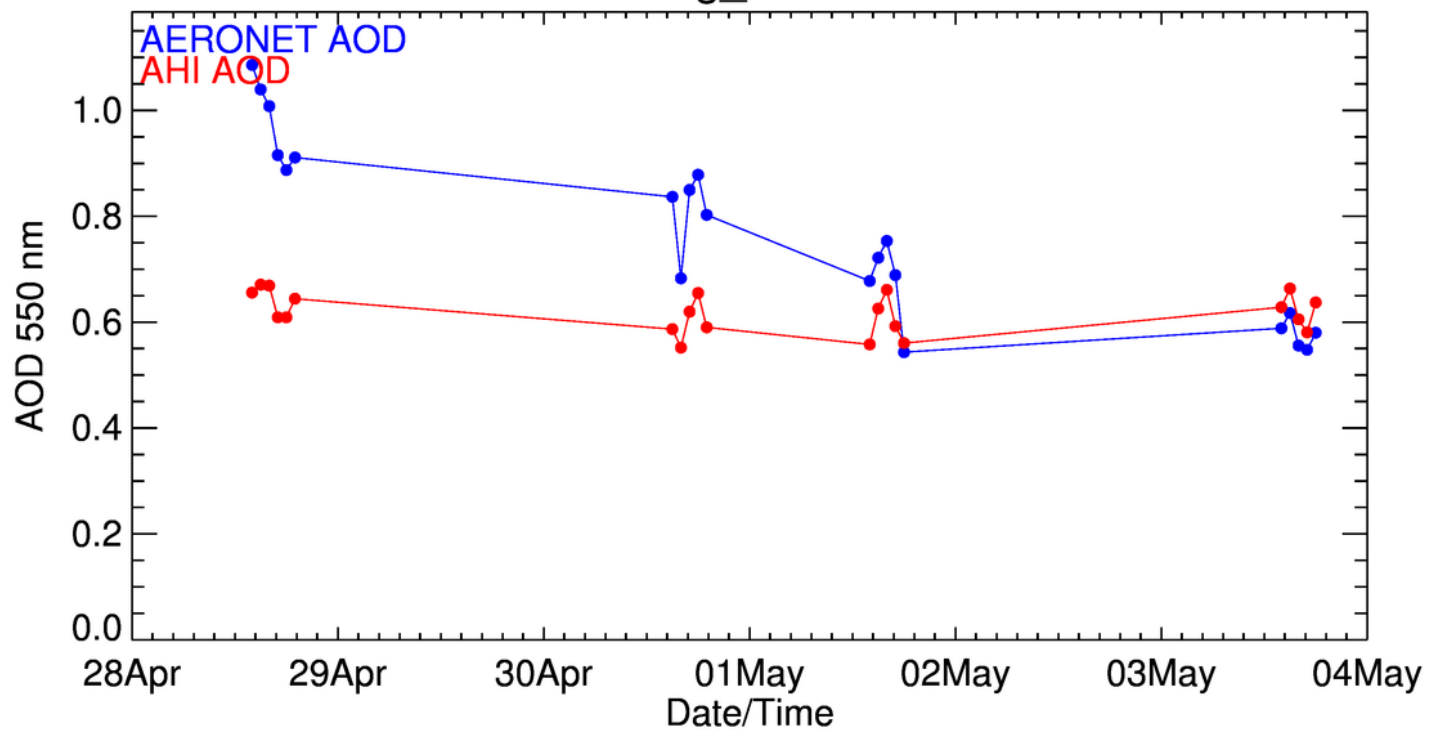



# Lulin

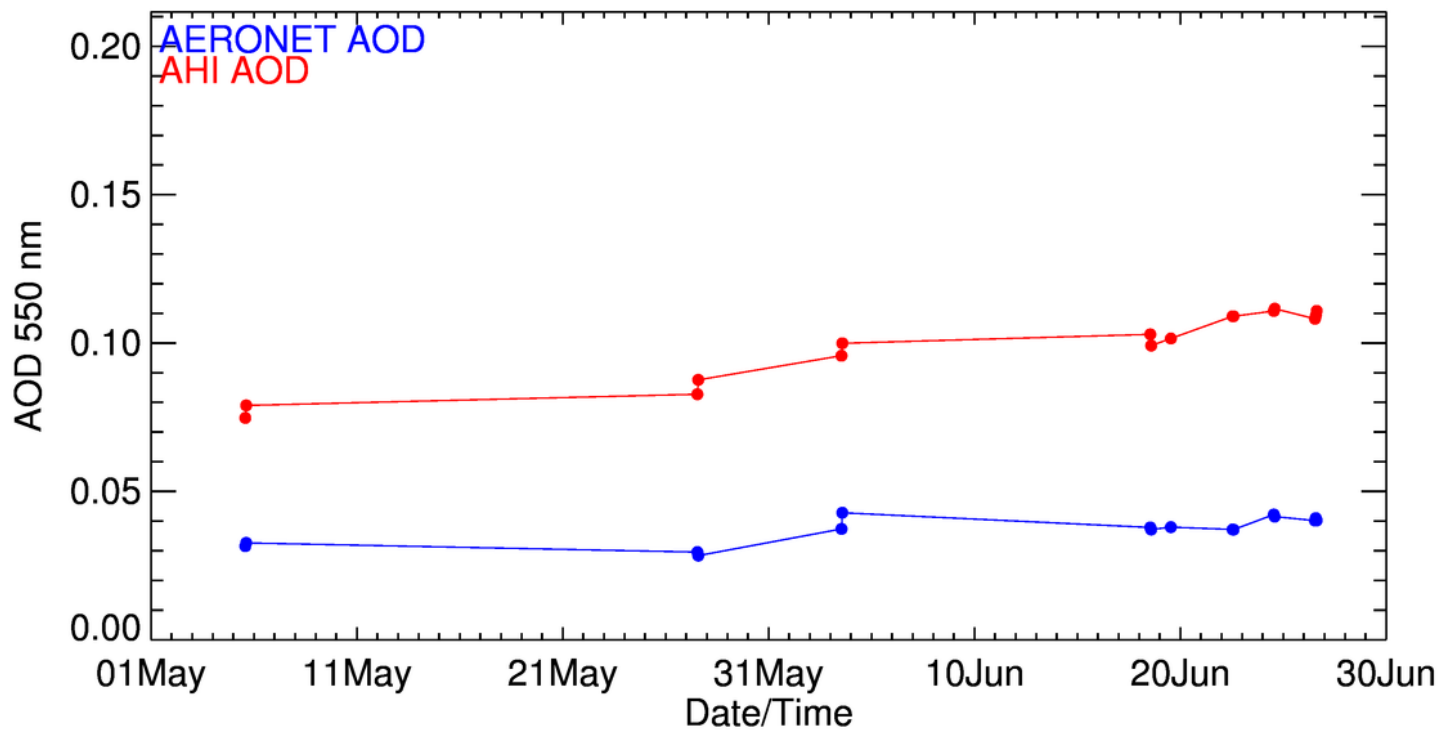

# ND\_Marbel\_Univ

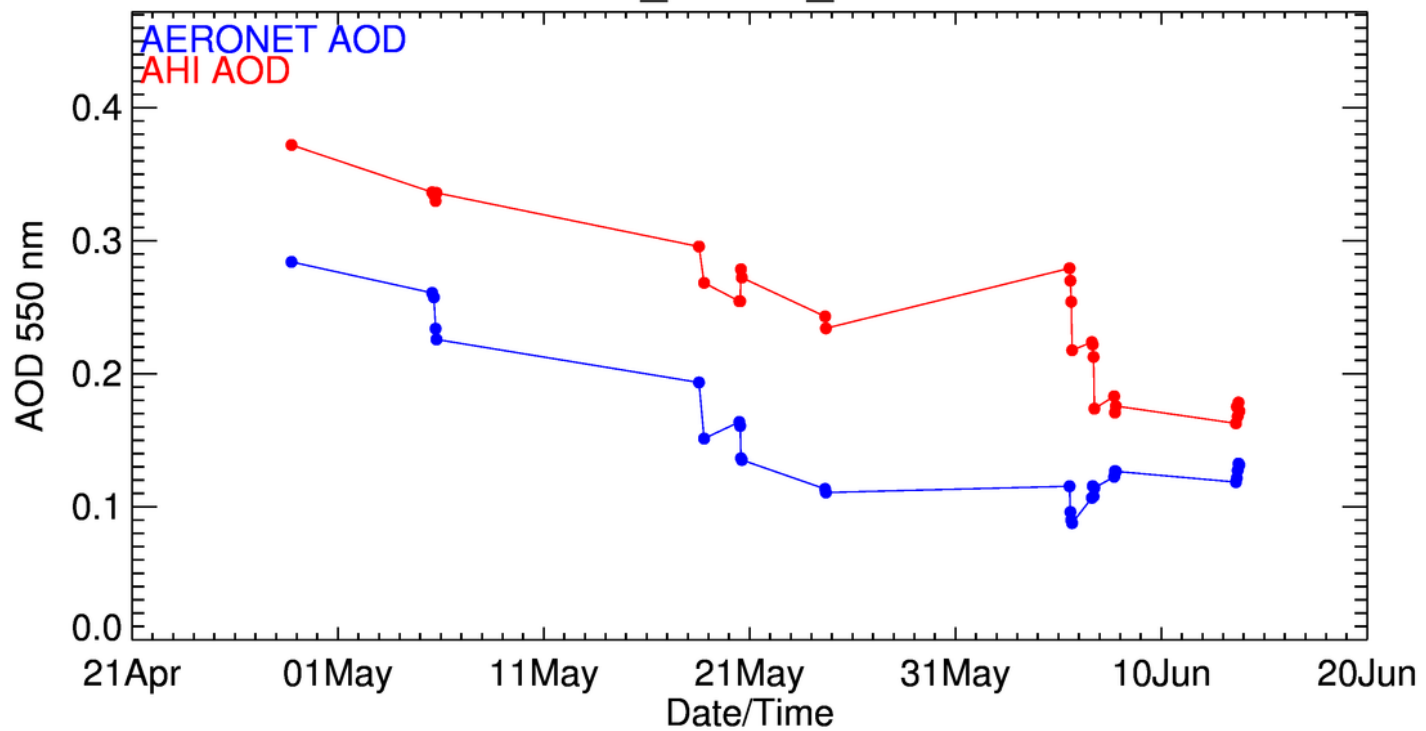

# NGHIA\_DO

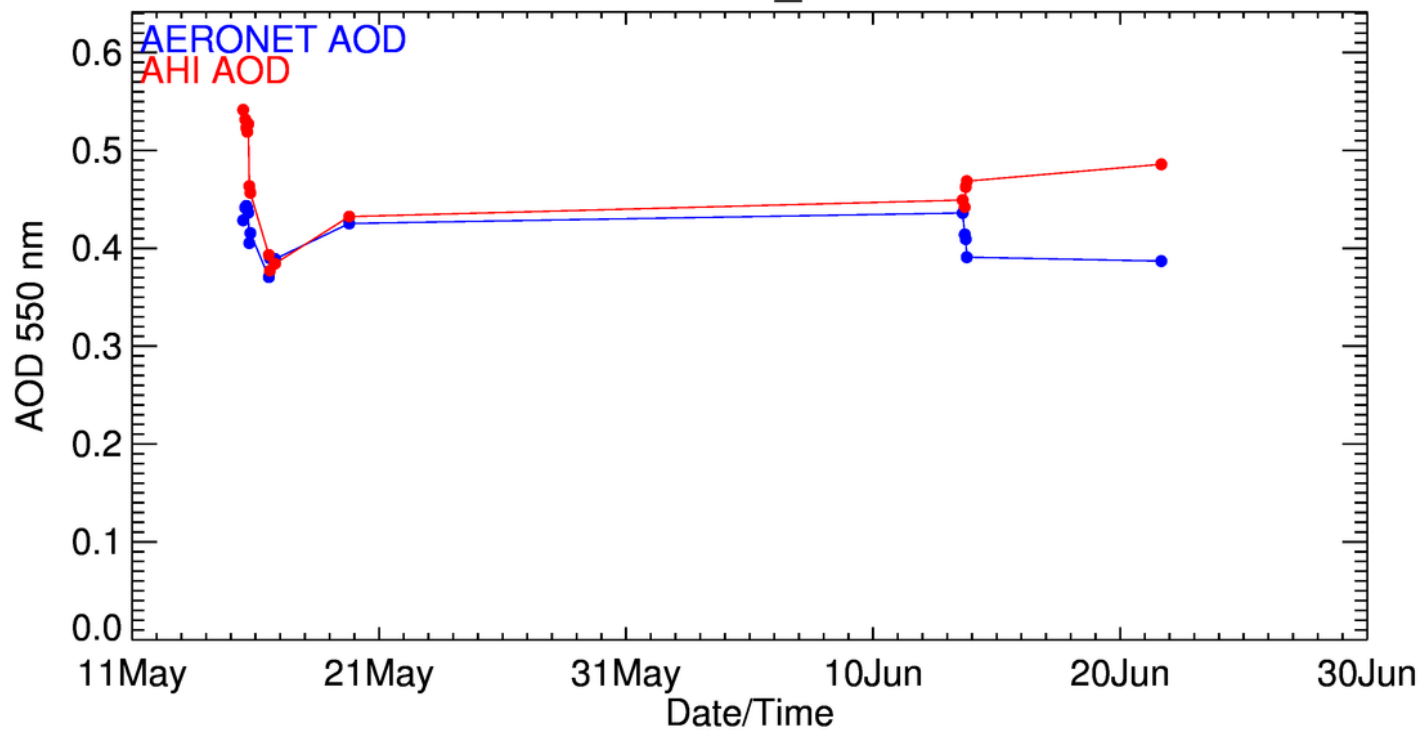

# Niigata

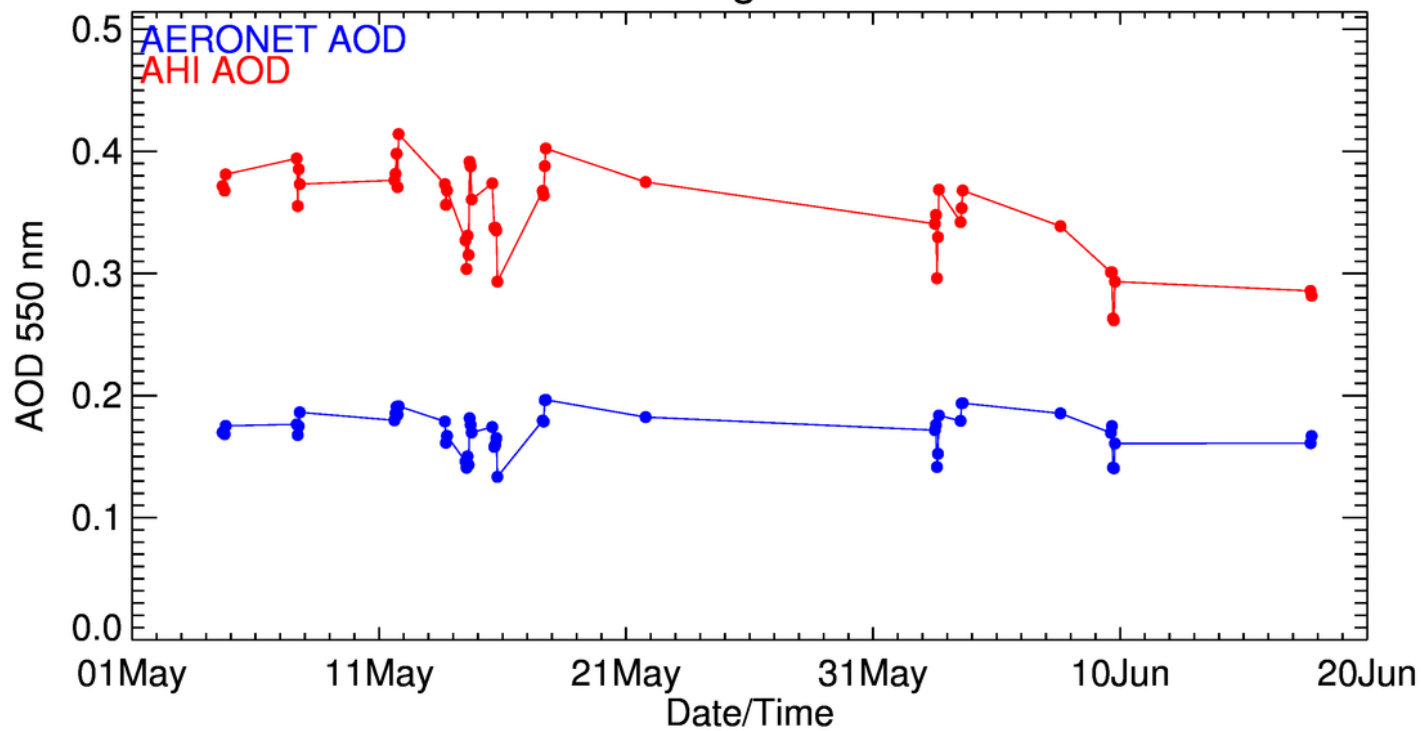

# Omkoï

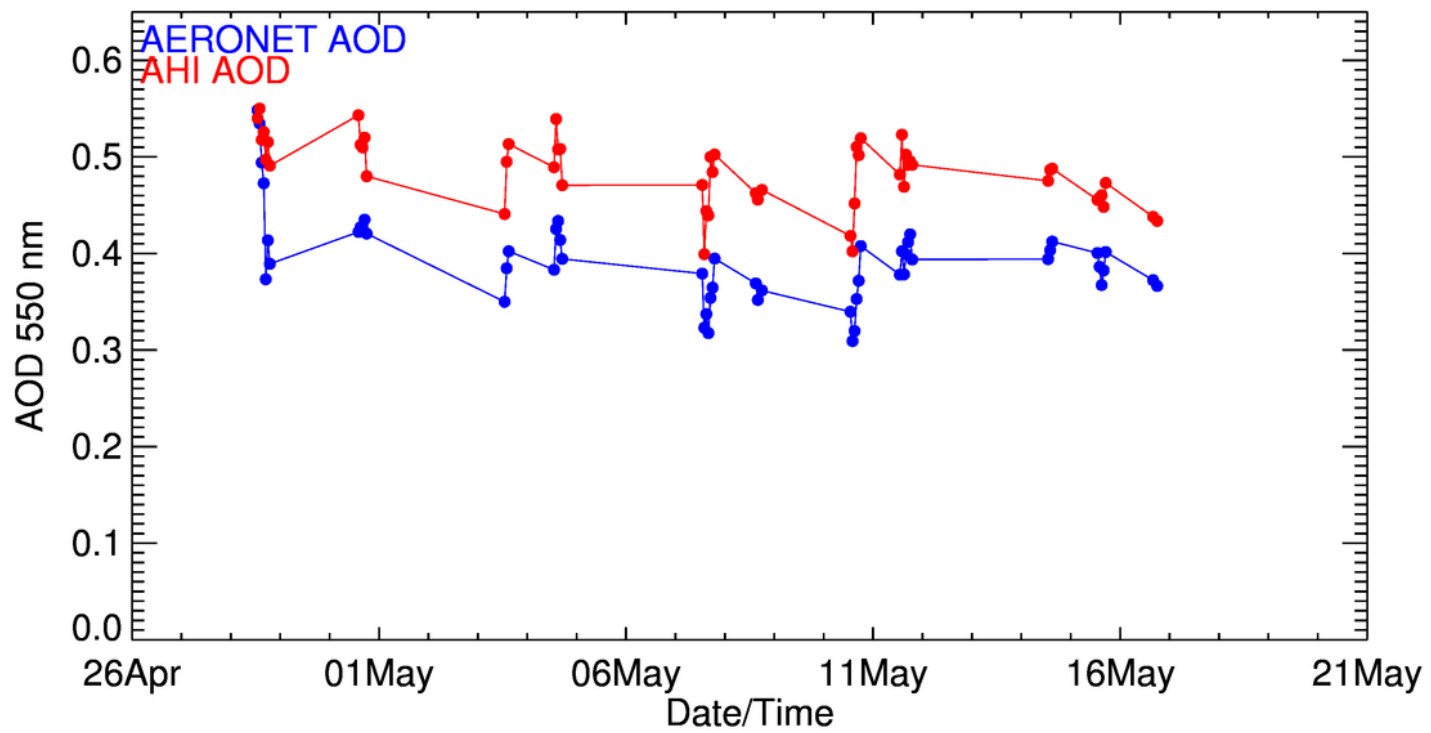

# Pusan\_NU

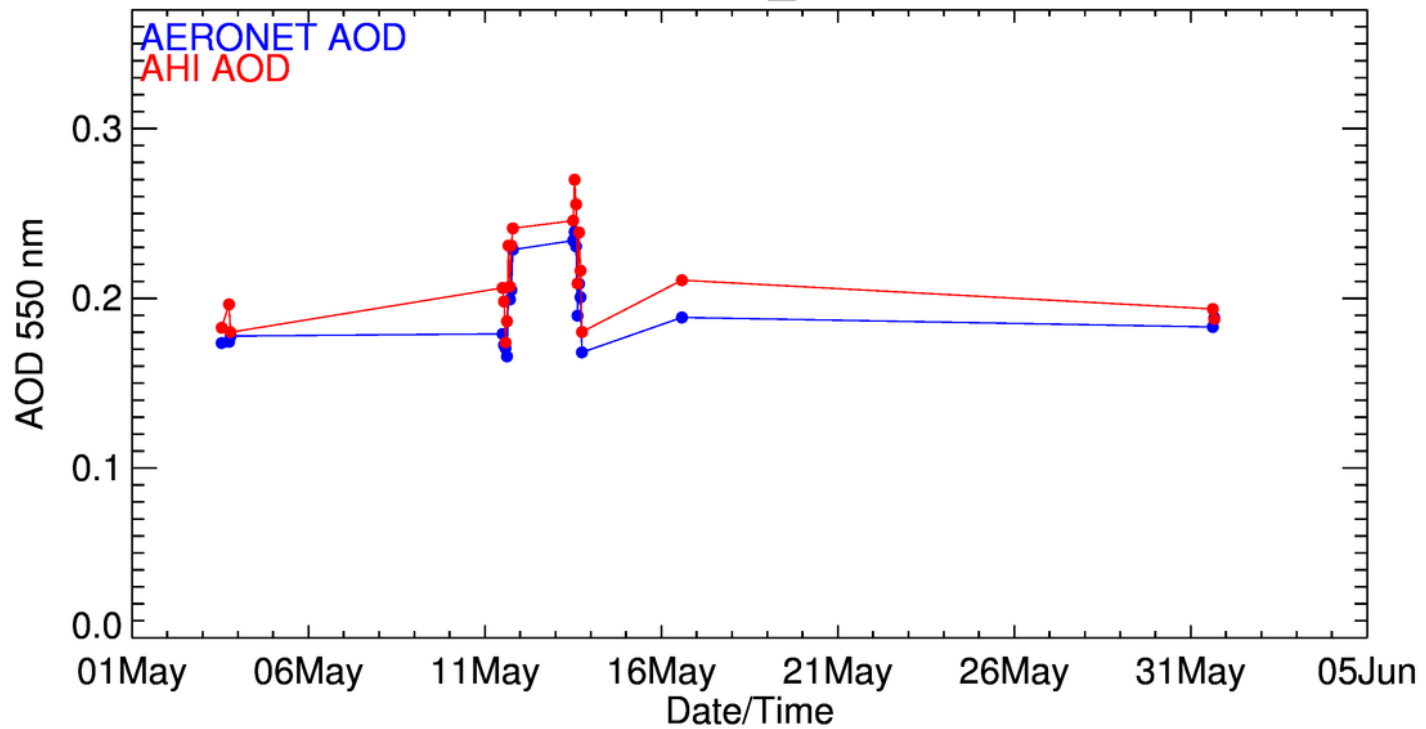

# Seoul\_SNU

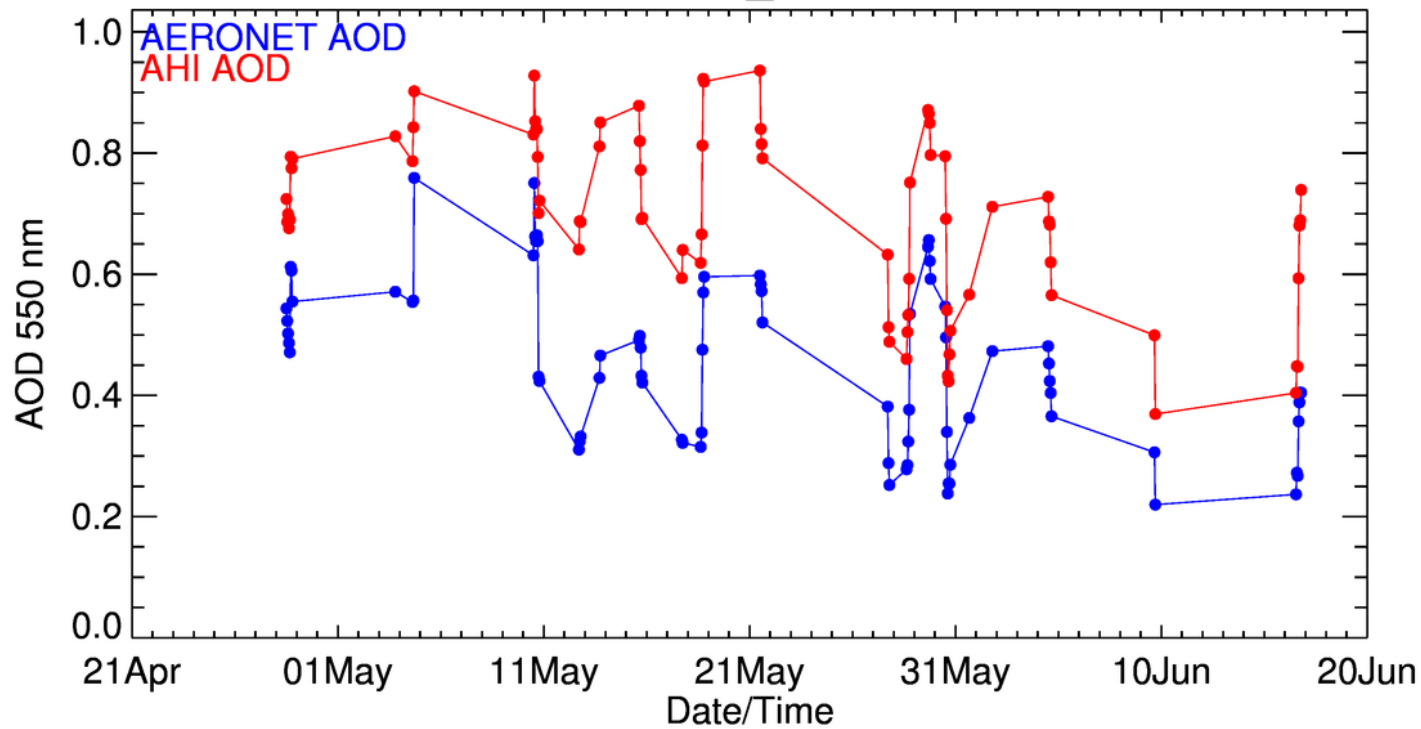

# Shirahama

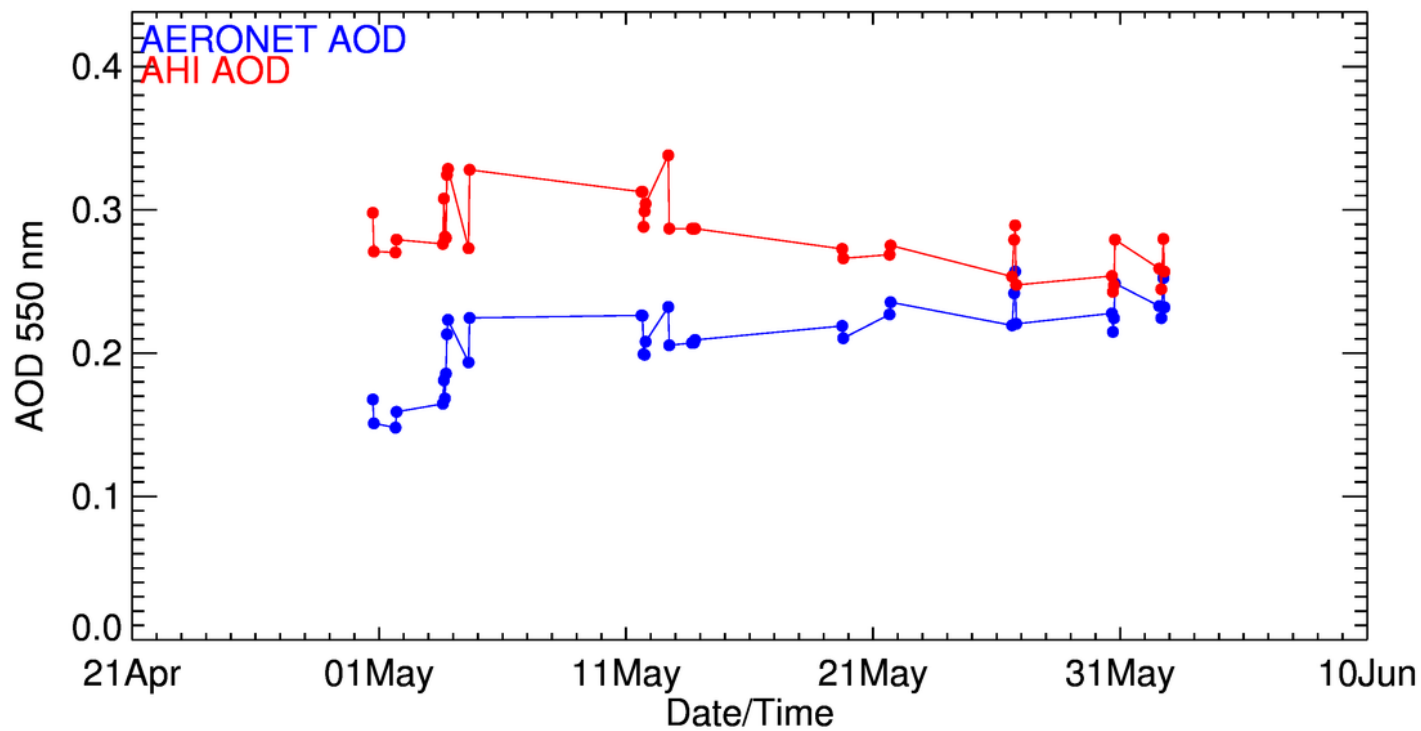



# Silpakorn\_Univ

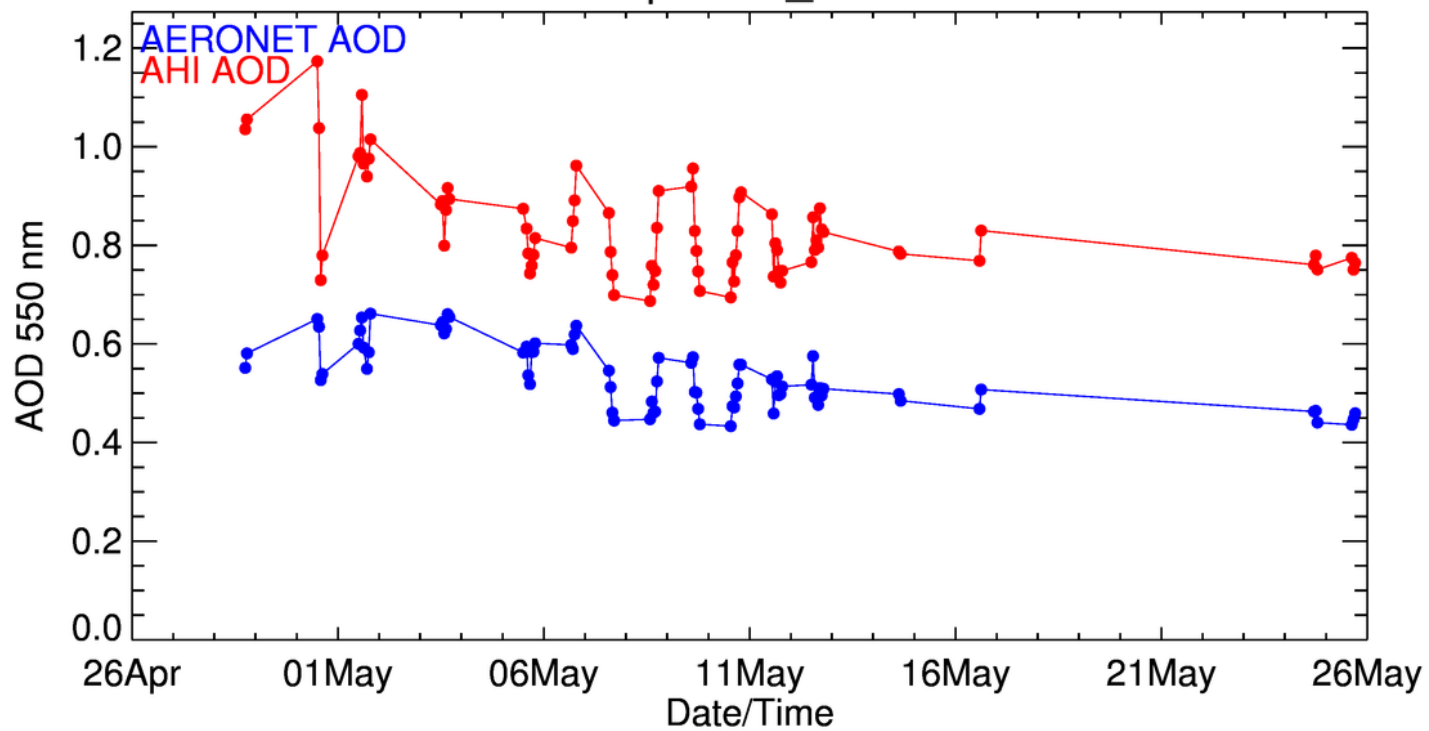

# Son\_La

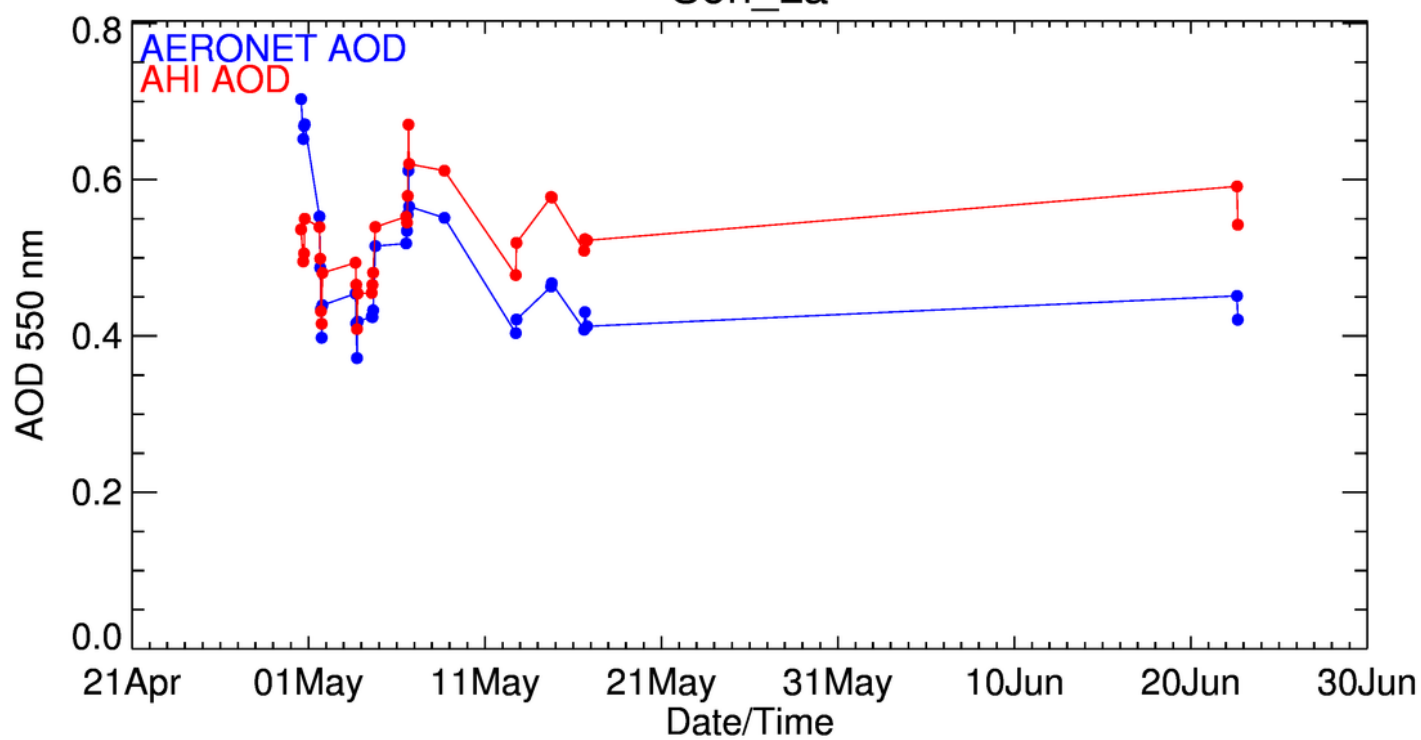

# Taihu

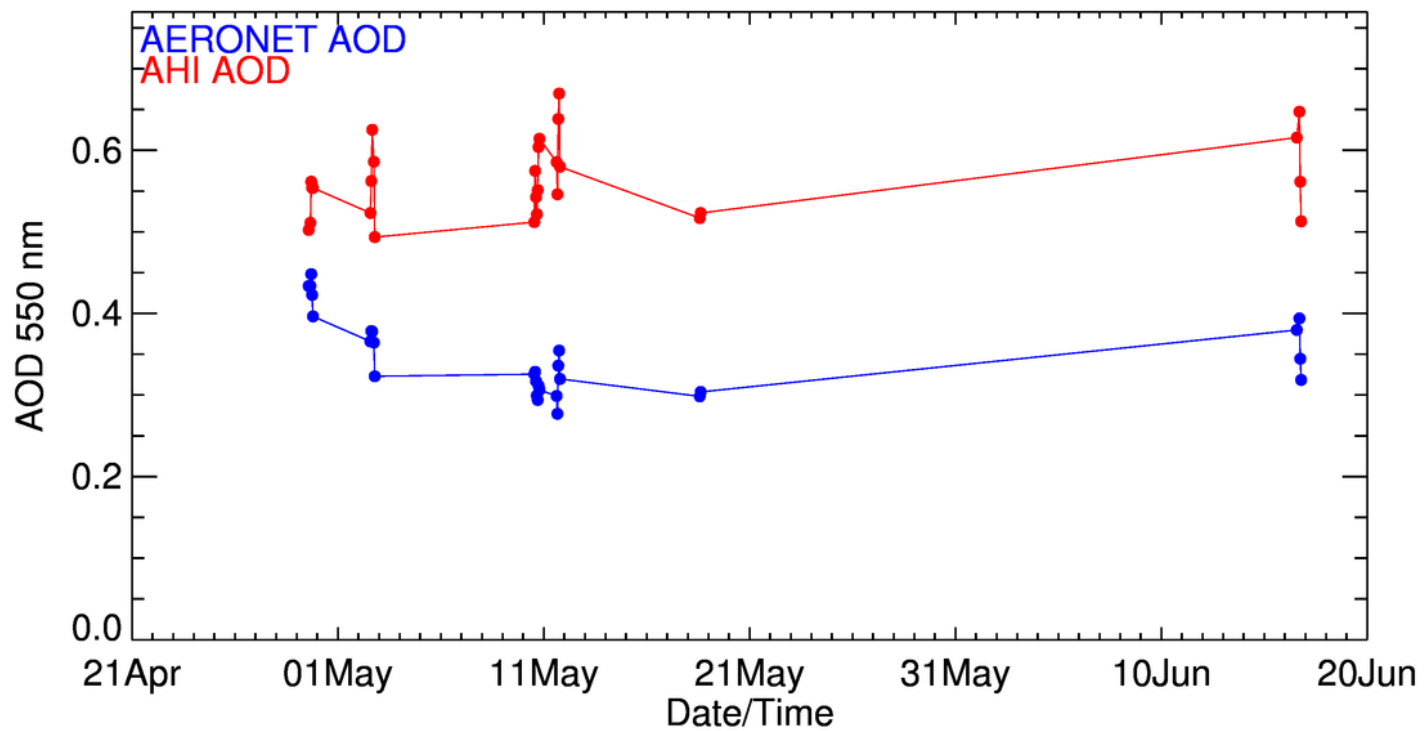

# Ubon\_Ratchathani

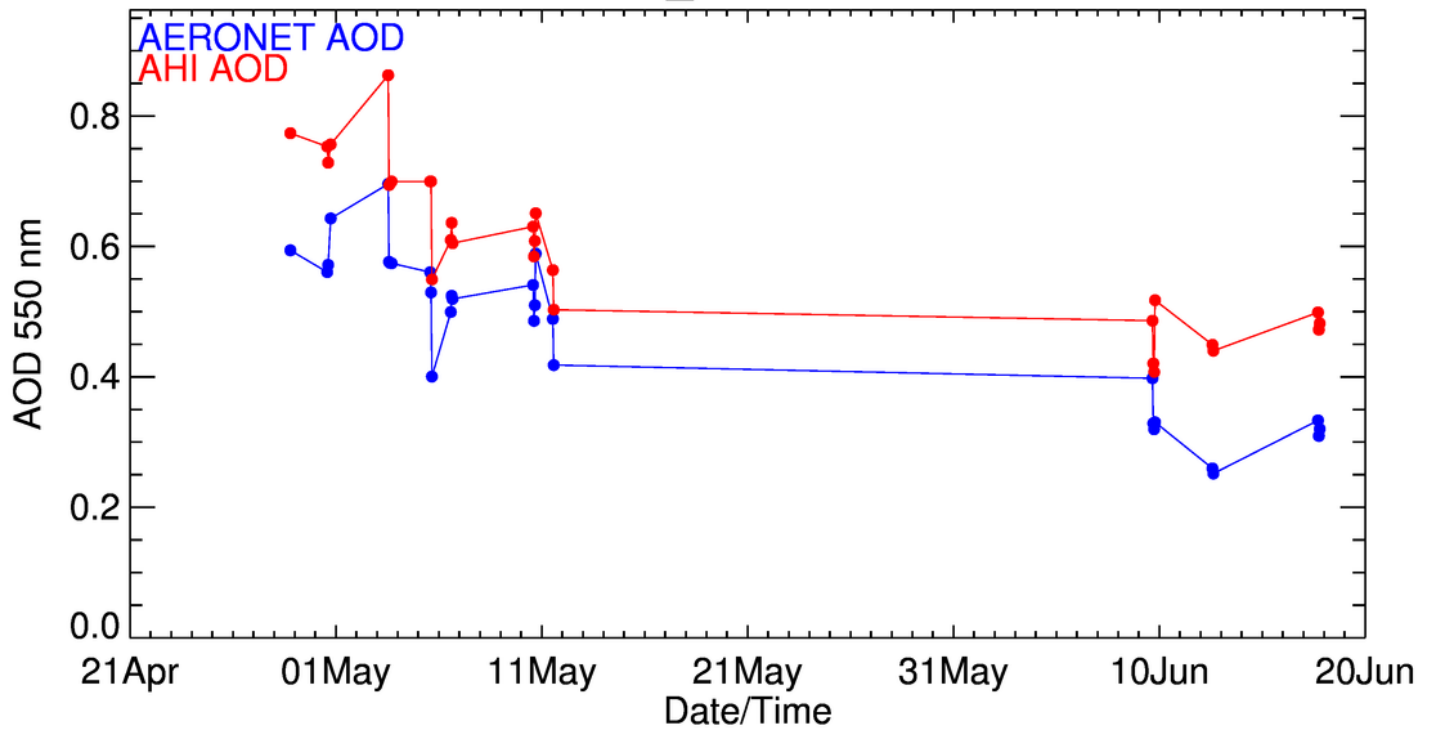

# Ussuriysk

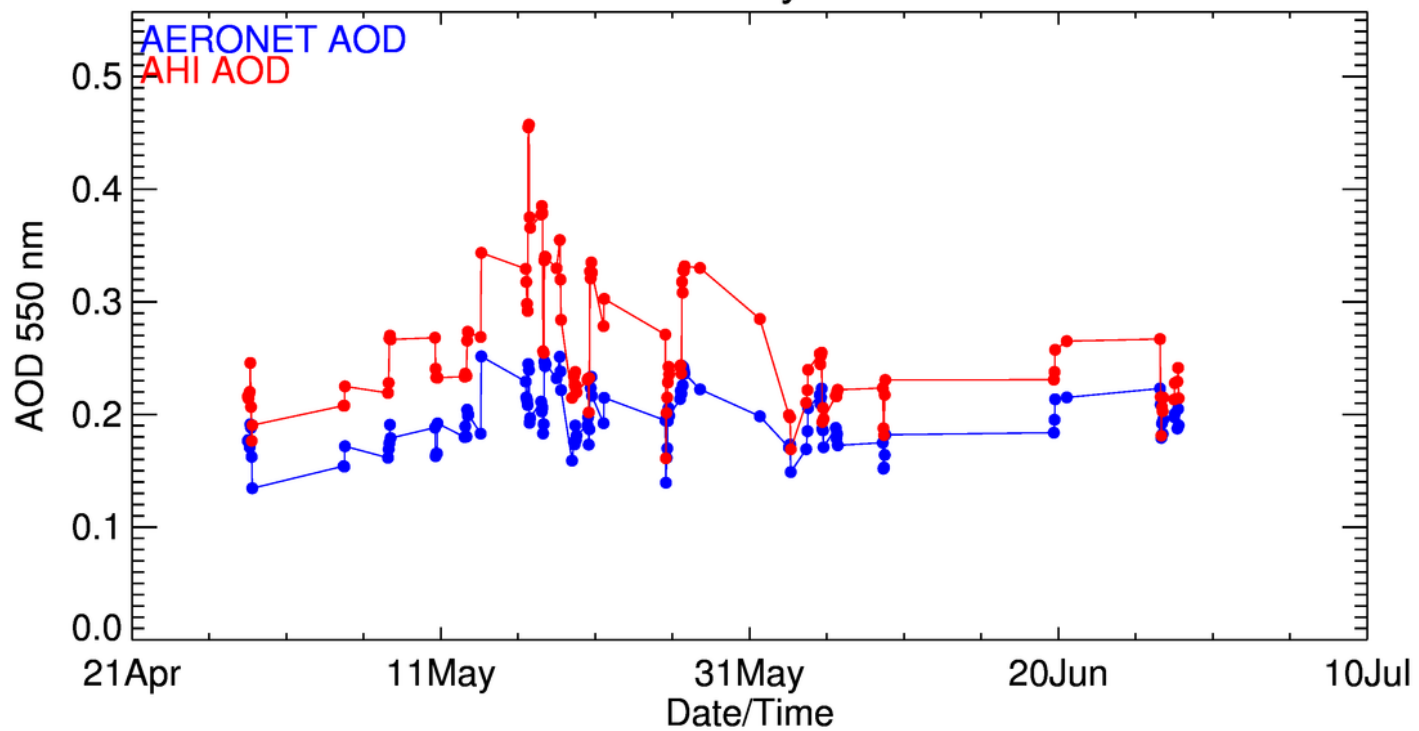

# XiangHe

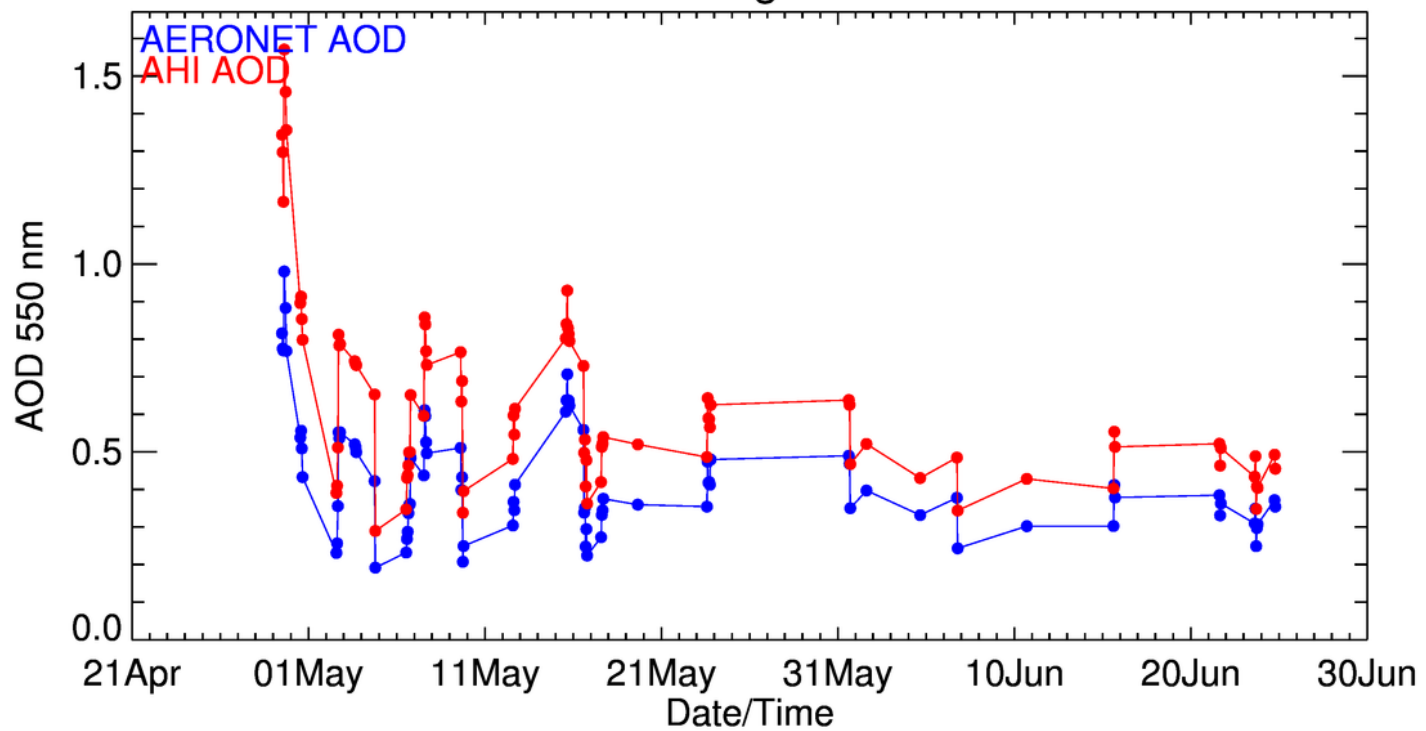

# Yonsei\_University

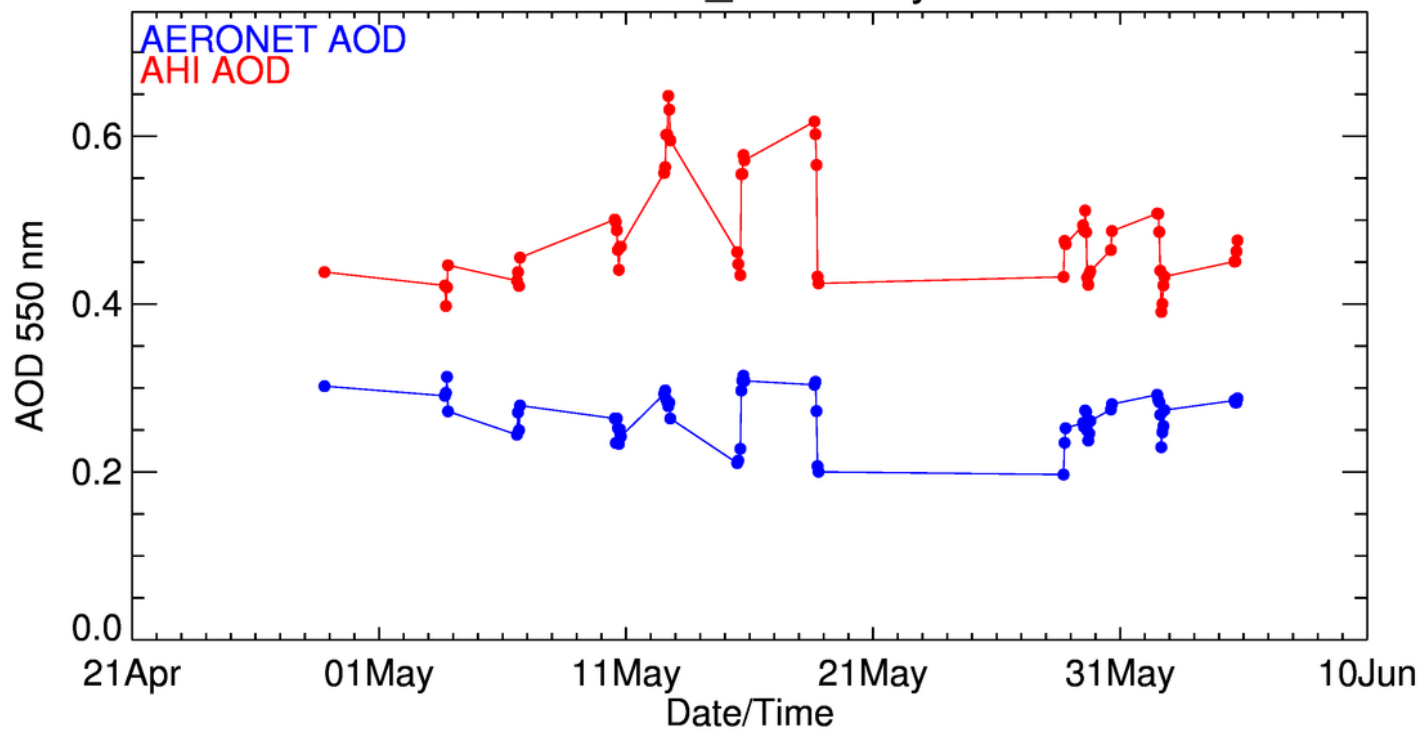

Supplement: Supplementary file 1 [file amt-12-6557-2019-supplement.pdf]
